# Supplementary material for: Synthesis of novel types of polyester glycodendrimers as potential inhibitors of urinary tract infections
Source: Royal Society of Chemistry journal article supplement (doi:10.1039/c4nj00992d), 2015-01-01

## Supporting information

### Synthesis of Novel Types of Polyester Glycodendrimers as potential inhibitors of Urinary Tract Infections

Jean-d'Amour K. Twibanire,<sup>a,b,\*</sup> Nawal K. Paul, and T. Bruce Grindley<sup>a,\*</sup>

<sup>a</sup>Department of Chemistry, Dalhousie University, Halifax, N.S. B3H 4J3, Canada

<sup>b</sup>CanAm Bioresearch Inc., Winnipeg, MB R3T 0P4, Canada

\*Corresponding Author

Email(s): [twibanire@dal.ca](mailto:twibanire@dal.ca) (J.K.T.), [bruce.grindley@dal.ca](mailto:bruce.grindley@dal.ca) (T.B.G.)

## Table of Contents

| Title                                                                                                                                                           | Page |
|-----------------------------------------------------------------------------------------------------------------------------------------------------------------|------|
| 500.13 MHz $^1\text{H}$ NMR spectrum of 2-propynyl 2,3,4,6-tetra- <i>O</i> -acetyl- $\alpha$ -D-mannopyranoside ( <b>6</b> ) in chloroform- <i>d</i>            | S5   |
| 125.7 MHz $^{13}\text{C}$ NMR spectrum of 2-propynyl 2,3,4,6-tetra- <i>O</i> -acetyl- $\alpha$ -D-mannopyranoside ( <b>6</b> ) in chloroform- <i>d</i>          | S6   |
| 300.15 MHz $^1\text{H}$ NMR spectrum of 2-propynyl $\alpha$ -D-mannopyranoside ( <b>7</b> ) in methanol- <i>d</i> <sub>4</sub>                                  | S6   |
| 75.5 MHz $^{13}\text{C}$ NMR spectrum of 2-propynyl $\alpha$ -D-mannopyranoside ( <b>7</b> ) in methanol- <i>d</i> <sub>4</sub>                                 | S7   |
| 500.13 MHz $^1\text{H}$ NMR spectrum of 6-azidohexyl 2,3,4,6-tetra- <i>O</i> -acetyl- $\alpha$ -D-mannopyranoside ( <b>9</b> ) in chloroform- <i>d</i>          | S8   |
| 125.7 MHz $^{13}\text{C}$ NMR spectrum of 6-azidohexyl 2,3,4,6-tetra- <i>O</i> -acetyl- $\alpha$ -D-mannopyranoside ( <b>9</b> ) in chloroform- <i>d</i>        | S9   |
| 500.13 MHz $^1\text{H}$ NMR spectrum of 6-azidohexyl $\alpha$ -D-mannopyranoside ( <b>10</b> ) in methanol- <i>d</i>                                            | S9   |
| 125.7 MHz $^{13}\text{C}$ NMR spectrum of 6-azidohexyl $\alpha$ -D-mannopyranoside ( <b>10</b> ) in methanol- <i>d</i>                                          | S10  |
| 500.13 MHz $^1\text{H}$ NMR spectrum of methyl and benzyl-protected hydroquinone-cored first generation dendrimer ( <b>15</b> ) in chloroform- <i>d</i>         | S11  |
| 125.7 MHz $^{13}\text{C}$ NMR spectrum of methyl and benzyl-protected hydroquinone-cored first generation dendrimer ( <b>15</b> ) in chloroform- <i>d</i>       | S12  |
| 500.13 MHz $^1\text{H}$ NMR spectrum of bis(2-(3-hydroxy-2,2-bis-(methoxymethyl)-propanoyloxy)ethoxy)benzene ( <b>16</b> ) in acetone- <i>d</i> <sub>6</sub>    | S12  |
| 125.7 MHz $^{13}\text{C}$ NMR spectrum of bis(2-(3-hydroxy-2,2-bis-(methoxymethyl)-propanoyloxy)-ethoxy)benzene ( <b>16</b> ) in acetone- <i>d</i> <sub>6</sub> | S13  |
| 300.15 MHz $^1\text{H}$ NMR spectrum of azide-functionalized divalent first generation dendrimer ( <b>17</b> ) in chloroform- <i>d</i>                          | S13  |
| 75.5 MHz $^{13}\text{C}$ NMR spectrum of azide-functionalized divalent first generation dendrimer ( <b>17</b> ) in chloroform- <i>d</i>                         | S14  |
| 500.13 MHz $^1\text{H}$ NMR spectrum of benzyl-functionalized divalent dendrimer ( <b>18</b> ) in chloroform- <i>d</i>                                          | S15  |
| 125.7 MHz $^{13}\text{C}$ NMR spectrum of benzyl-functionalized divalent dendrimer ( <b>18</b> ) in chloroform- <i>d</i>                                        | S16  |
| 500.13 MHz $^1\text{H}$ NMR spectrum of hydroxyl-terminated divalent dendrimer ( <b>19</b> ) in methanol- <i>d</i> <sub>4</sub>                                 | S16  |
| 125.7 MHz $^{13}\text{C}$ NMR spectrum of hydroxyl-terminated divalent dendrimer ( <b>19</b> ) in methanol- <i>d</i> <sub>4</sub>                               | S17  |
| 300.15 MHz $^1\text{H}$ NMR spectrum of azide-functionalized divalent dendrimer ( <b>20</b> ) in chloroform- <i>d</i>                                           | S18  |
| 75.5 MHz $^{13}\text{C}$ NMR spectrum of azide-functionalized divalent dendrimer ( <b>20</b> ) in chloroform- <i>d</i>                                          | S19  |
| 500.13 MHz $^1\text{H}$ NMR spectrum of benzylidene-protected hydroquinone-cored third generation dendrimer ( <b>23</b> ) in chloroform- <i>d</i>               | S19  |
| 125.7 MHz $^{13}\text{C}$ NMR spectrum of benzylidene-protected hydroquinone-cored third generation dendrimer ( <b>23</b> ) in chloroform- <i>d</i>             | S20  |
| 500.13 MHz $^1\text{H}$ NMR spectrum of third generation dendrimer ( <b>24</b> ) in DMSO- <i>d</i> <sub>6</sub>                                                 | S21  |
| 125.7 MHz $^{13}\text{C}$ NMR spectrum of third generation dendrimer ( <b>24</b> ) in DMSO- <i>d</i> <sub>6</sub>                                               | S22  |

|                                                                                                                                                                                                        |     |
|--------------------------------------------------------------------------------------------------------------------------------------------------------------------------------------------------------|-----|
| 500.13 MHz $^1\text{H}$ NMR spectrum of azide-functionalized hydroquinone-cored third generation dendrimer ( <b>25</b> ) in chloroform- <i>d</i>                                                       | S23 |
| 125.7 MHz $^{13}\text{C}$ NMR spectrum of azide-functionalized hydroquinone-cored third generation dendrimer ( <b>25</b> ) in chloroform- <i>d</i>                                                     | S24 |
| 500.13 MHz $^1\text{H}$ NMR spectrum of extended divalent $\alpha$ -D-mannopyranoside-terminated dendrimer ( <b>27</b> ) in methanol- <i>d</i> <sub>4</sub>                                            | S25 |
| 125.7 MHz $^{13}\text{C}$ NMR spectrum of extended divalent $\alpha$ -D-mannopyranoside-terminated dendrimer ( <b>27</b> ) in methanol- <i>d</i> <sub>4</sub>                                          | S26 |
| 500.13 MHz $^1\text{H}$ NMR spectrum of third generation dendrimer bearing 16 mannose residues ( <b>28</b> ) in water- <i>d</i> <sub>2</sub>                                                           | S27 |
| 125.7 MHz $^{13}\text{C}$ NMR spectrum of third generation dendrimer bearing 16 mannose residues ( <b>28</b> ) in water- <i>d</i> <sub>2</sub>                                                         | S27 |
| 500.13 MHz $^1\text{H}$ NMR spectrum of bis(2-(2-propynyloxy)ethoxy)benzene ( <b>29</b> ) in chloroform- <i>d</i>                                                                                      | S28 |
| 125.7 MHz $^{13}\text{C}$ NMR spectrum of bis(2-(2-propynyloxy)ethoxy)benzene ( <b>29</b> ) in chloroform- <i>d</i>                                                                                    | S28 |
| 500.13 MHz $^1\text{H}$ NMR spectrum of divalent $\alpha$ -D-mannopyranoside-terminated dendrimer with a hexyl linker ( <b>30</b> ) in DMSO- <i>d</i> <sub>6</sub> / methanol- <i>d</i> <sub>4</sub>   | S29 |
| 125.7 MHz $^{13}\text{C}$ NMR spectrum of divalent $\alpha$ -D-mannopyranoside-terminated dendrimer with a hexyl linker ( <b>30</b> ) in DMSO- <i>d</i> <sub>6</sub> / methanol- <i>d</i> <sub>4</sub> | S30 |
| 500.13 MHz $^1\text{H}$ NMR spectrum of 2,2'-bis-(2-propynyloxymethyl)propanoic acid ( <b>31</b> ) in chloroform- <i>d</i>                                                                             | S31 |
| 125.7 MHz $^{13}\text{C}$ NMR spectrum of 2,2'-bis-(2-propynyloxymethyl)propanoic acid ( <b>31</b> ) in chloroform- <i>d</i>                                                                           | S32 |
| 500.13 MHz $^1\text{H}$ NMR spectrum of 2,2'-bis-(2-propynyloxymethyl)propanoyl anhydride ( <b>32</b> ) in chloroform- <i>d</i>                                                                        | S32 |
| 125.7 MHz $^{13}\text{C}$ NMR spectrum of 2,2'-bis-(2-propynyloxymethyl)propanoyl anhydride ( <b>32</b> ) in chloroform- <i>d</i>                                                                      | S33 |
| 500.13 MHz $^1\text{H}$ NMR spectrum of 1,4-bis-2-(2,2'-bis-(2-propynyloxy)methyl)propanoyloxy)-ethoxy)benzene ( <b>33</b> ) in chloroform- <i>d</i>                                                   | S34 |
| 125.7 MHz $^{13}\text{C}$ NMR spectrum of 1,4-bis-2-(2,2'-bis-(2-propynyloxy)methyl)propanoyloxy)-ethoxy)benzene ( <b>33</b> ) in chloroform- <i>d</i>                                                 | S35 |
| 500.13 MHz $^1\text{H}$ NMR spectrum of tetramannoside polyester dendrimer ( <b>34</b> ) in dimethyl sulfoxide- <i>d</i> <sub>6</sub>                                                                  | S36 |
| 125.7 MHz $^{13}\text{C}$ DeptQ spectrum of tetramannoside polyester dendrimer ( <b>34</b> ) in dimethyl sulfoxide- <i>d</i> <sub>6</sub>                                                              | S38 |
| 500.13 MHz $^1\text{H}$ NMR spectrum of 2-(p-toluenesulfonyl)ethyl 2,2'-bis(2,2'-bis-(2-propynyloxymethyl)propanoyloxymethyl)propanoate ( <b>36</b> ) in chloroform- <i>d</i>                          | S39 |
| 125.7 MHz $^{13}\text{C}$ NMR spectrum of 2-(p-toluenesulfonyl)ethyl 2,2'-bis(2,2'-bis-(2-propynyloxymethyl)propanoyloxymethyl)propanoate ( <b>36</b> ) in chloroform- <i>d</i>                        | S41 |
| 500.13 MHz $^1\text{H}$ NMR spectrum of 2,2'-bis(2,2'-bis-(2-propynyloxymethyl)propanoyloxymethyl)propanoic acid ( <b>37</b> ) in chloroform- <i>d</i>                                                 | S42 |
| 125.7 MHz $^{13}\text{C}$ NMR spectrum of 2,2'-bis(2,2'-bis-(2-propynyloxymethyl)propanoyloxymethyl)propanoic acid ( <b>37</b> ) in chloroform- <i>d</i>                                               | S44 |
| 500.13 MHz $^1\text{H}$ NMR spectrum of 2,2'-bis(2,2'-bis-(2-propynyloxymethyl)propanoyloxymethyl)propanoic anhydride ( <b>38</b> ) in chloroform- <i>d</i>                                            | S45 |

|                                                                                                                                                                |     |
|----------------------------------------------------------------------------------------------------------------------------------------------------------------|-----|
| 125.7 MHz $^{13}\text{C}$ NMR spectrum of 2,2'-bis(2,2'-bis-(2-propynyloxymethyl)propanoyloxymethyl)-propanoic anhydride ( <b>38</b> ) in chloroform- <i>d</i> | S47 |
| 500.13 MHz $^1\text{H}$ NMR spectrum of octapropargylated polyester dendrimer ( <b>39</b> ) in chloroform- <i>d</i>                                            | S48 |
| 125.7 MHz $^{13}\text{C}$ NMR spectrum of octapropargylated polyester dendrimer ( <b>39</b> ) in chloroform- <i>d</i>                                          | S50 |
| 500.13 MHz $^1\text{H}$ NMR spectrum of octavalent mannose-terminated polyester dendrimer ( <b>40</b> ) in water- <i>d</i> <sub>2</sub>                        | S51 |
| 125.7 MHz $^{13}\text{C}$ NMR spectrum of octavalent mannose-terminated polyester dendrimer ( <b>40</b> ) in water- <i>d</i> <sub>2</sub>                      | S52 |
| 125.7 MHz $^{13}\text{C}$ DEPT Q NMR spectrum of octavalent mannose-terminated polyester dendrimer ( <b>40</b> ) in water- <i>d</i> <sub>2</sub>               | S54 |

500.13 MHz  $^1\text{H}$  NMR spectrum of 2-propynyl 2,3,4,6-tetra-*O*-acetyl- $\alpha$ -D-mannopyranoside (6) in chloroform-*d*

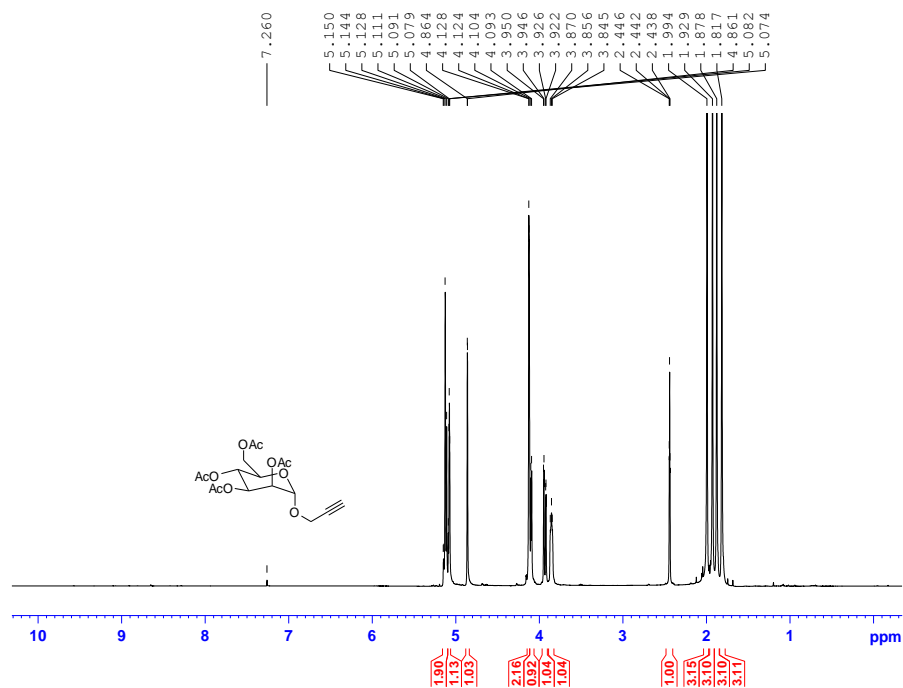

Expansions of parts of the 500.13 MHz  $^1\text{H}$  NMR spectrum of 2-propynyl 2,3,4,6-tetra-*O*-acetyl- $\alpha$ -D-mannopyranoside (6) in chloroform-*d*

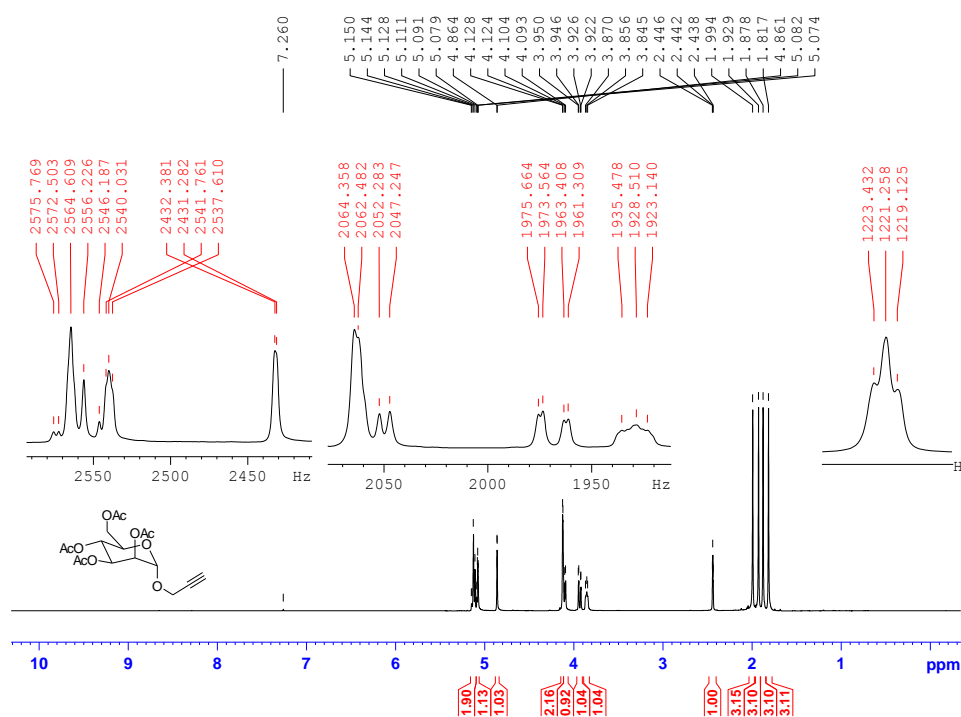

**125.7 MHz  $^{13}\text{C}$  NMR spectrum of 2-propynyl 2,3,4,6-tetra-*O*-acetyl- $\alpha$ -D-mannopyranoside (6) in chloroform-*d***

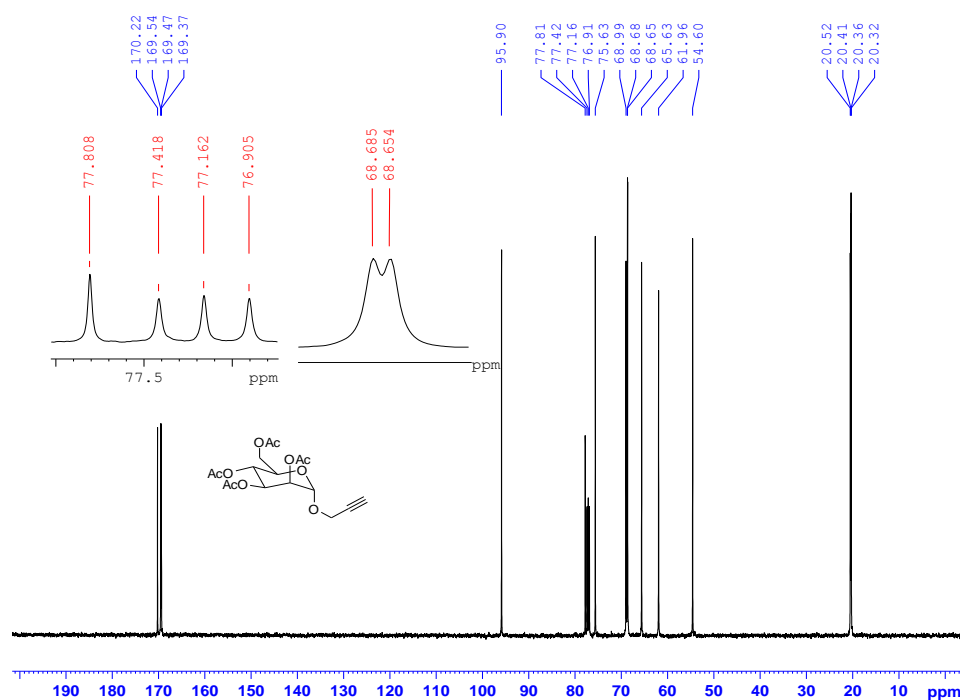

**300.15 MHz  $^1\text{H}$  NMR spectrum of 2-propynyl  $\alpha$ -D-mannopyranoside (7) in methanol-*d*<sub>4</sub>**

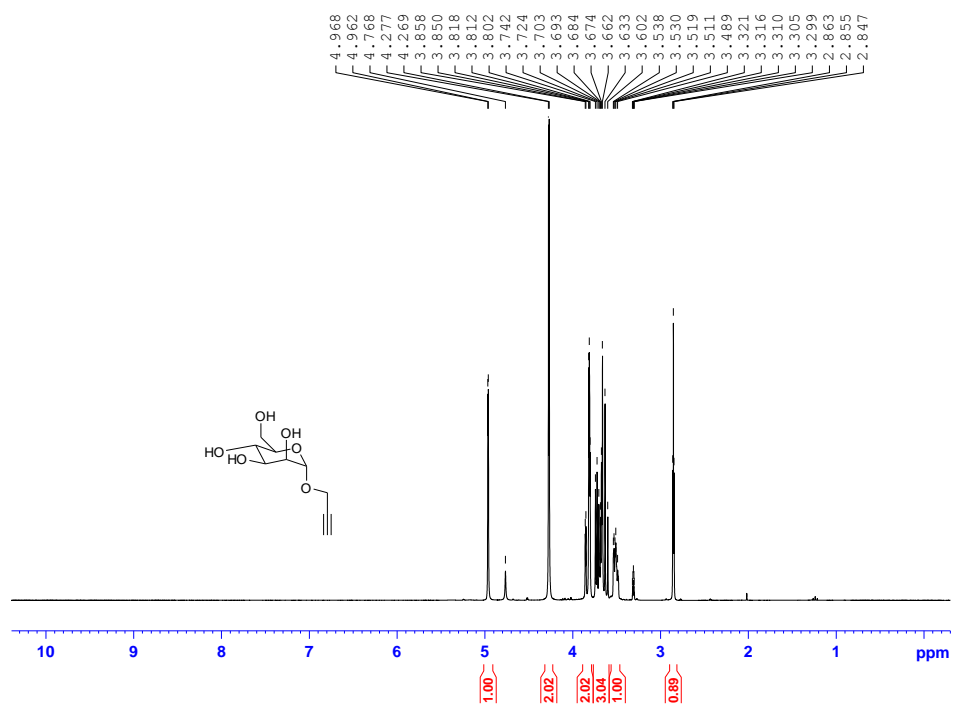

**Expansions of part of the 300.15 MHz  $^1\text{H}$  NMR spectrum of 2-propynyl  $\alpha$ -D-mannopyranoside (7) in methanol- $d_4$**

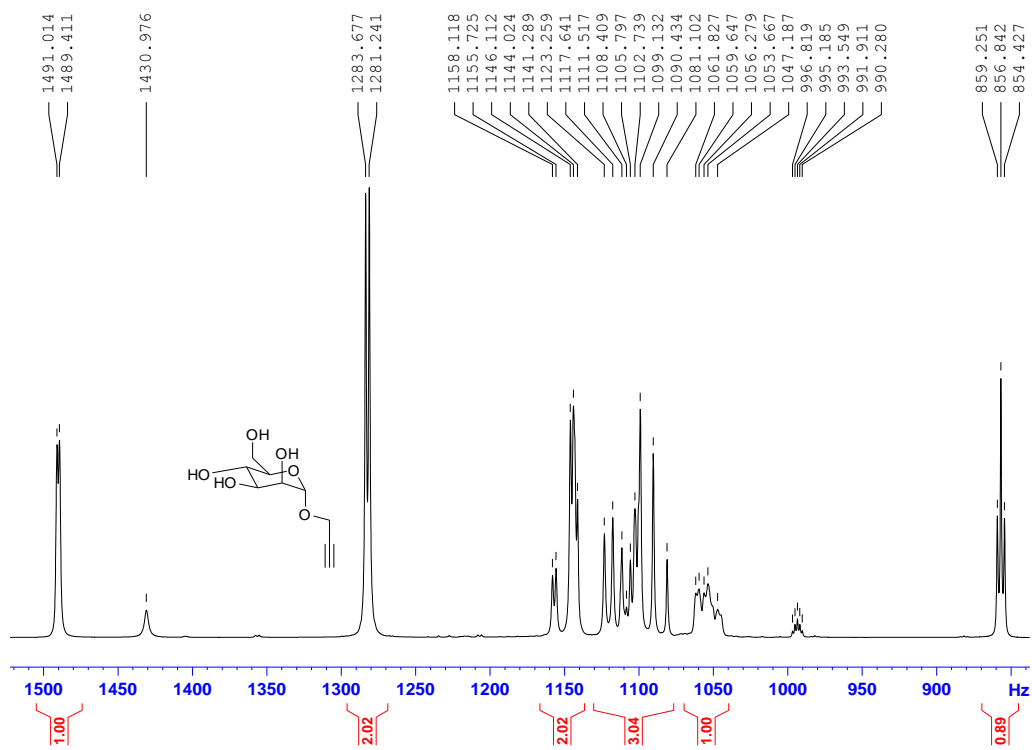

**75.5 MHz  $^{13}\text{C}$  NMR spectrum of 2-propynyl  $\alpha$ -D-mannopyranoside (7) in methanol- $d_4$**

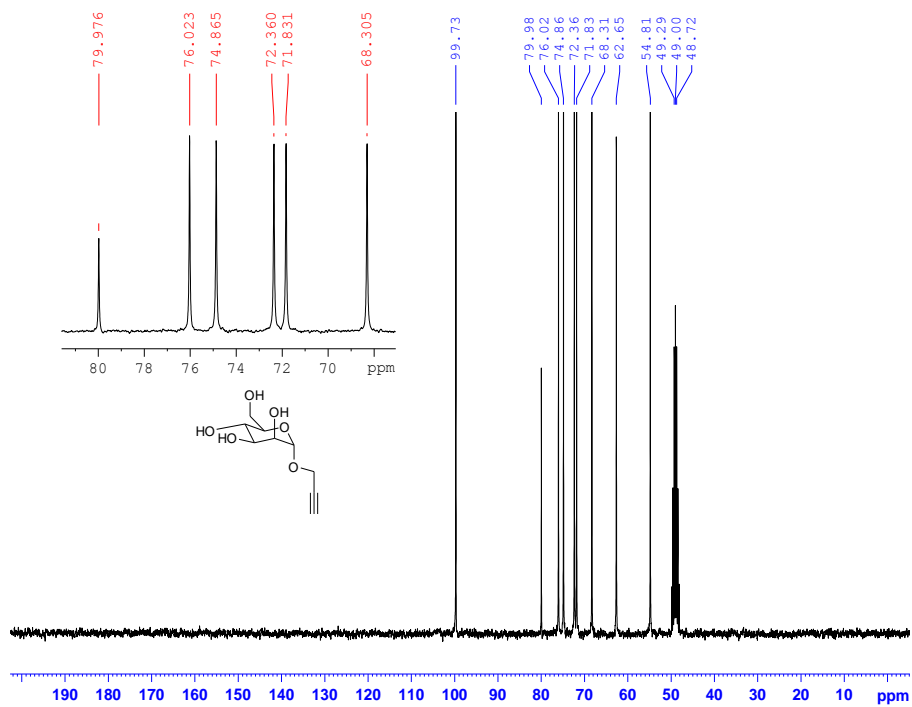

500.13 MHz  $^1\text{H}$  NMR spectrum of 6-azidohexyl 2,3,4,6-tetra-*O*-acetyl- $\alpha$ -D-mannopyranoside (9) in chloroform-*d*

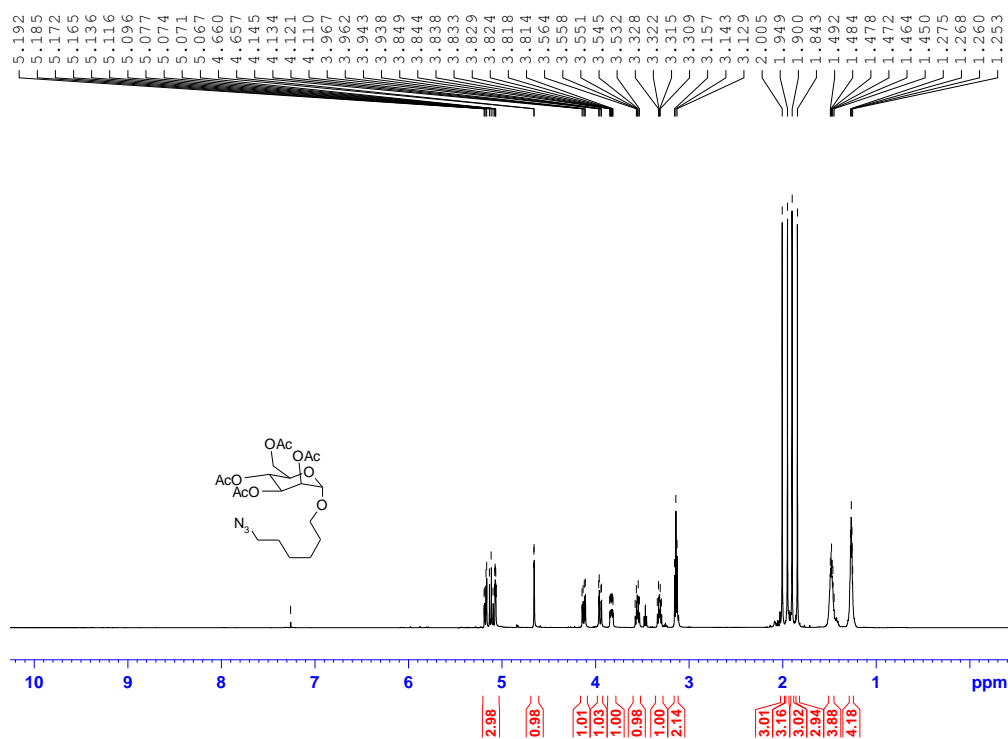

Expansions of part of the 500.13 MHz  $^1\text{H}$  NMR spectrum of 6-azidohexyl 2,3,4,6-tetra-*O*-acetyl- $\alpha$ -D-mannopyranoside (9) in chloroform-*d*

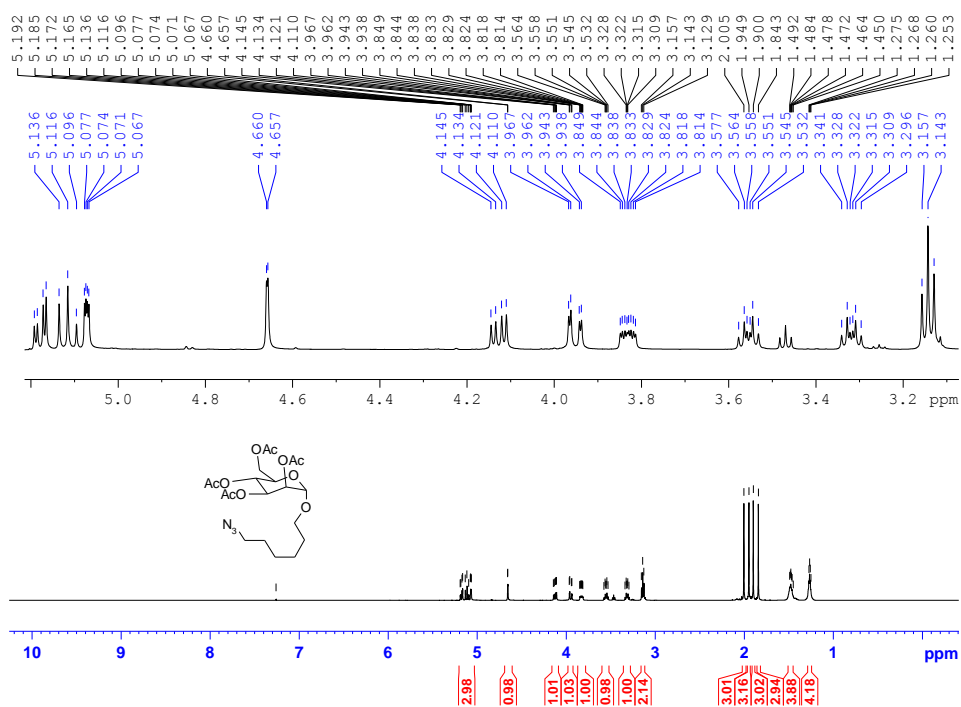



125.7 MHz  $^{13}\text{C}$  NMR spectrum of 6-azidoethyl 2,3,4,6-tetra-*O*-acetyl- $\alpha$ -D-mannopyranoside (9) in chloroform-*d*

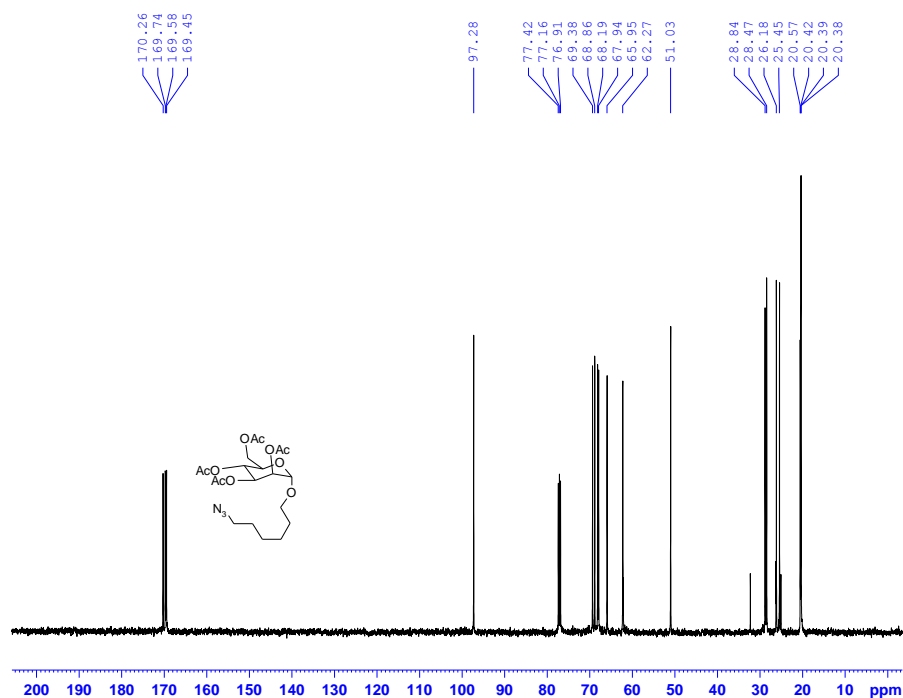

500.13 MHz  $^1\text{H}$  NMR spectrum of 6-azidoethyl  $\alpha$ -D-mannopyranoside (10) in methanol-*d*

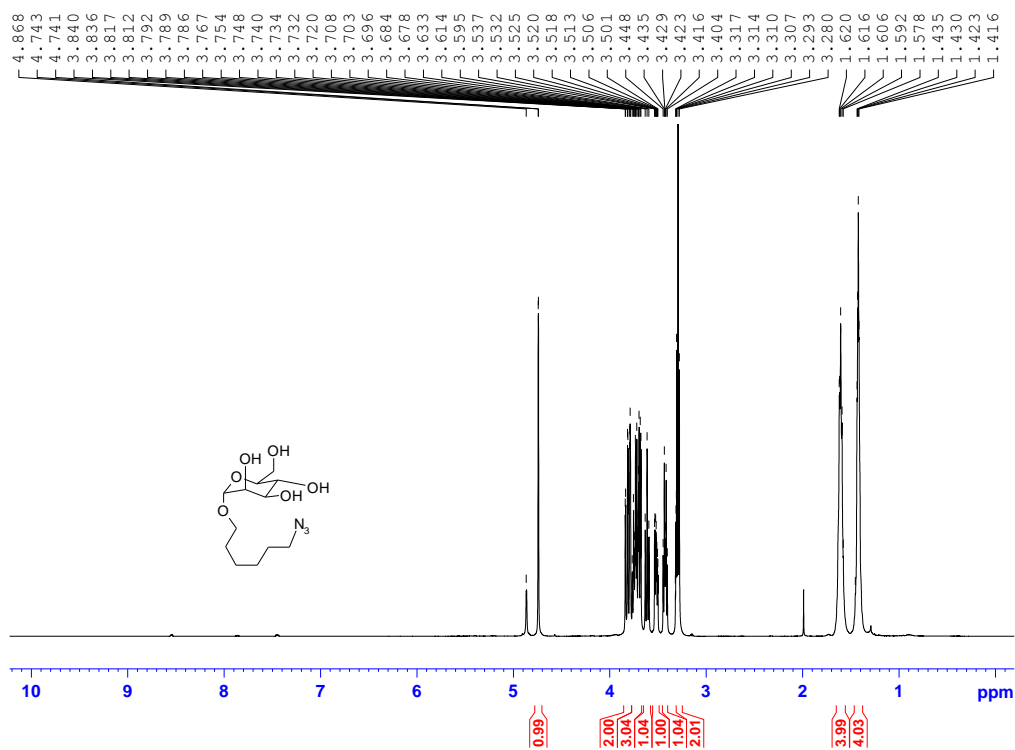

Expansion of part of the 500.13 MHz  $^1\text{H}$  NMR spectrum of 6-azidohexyl  $\alpha$ -D-mannopyranoside (10) in methanol-*d*

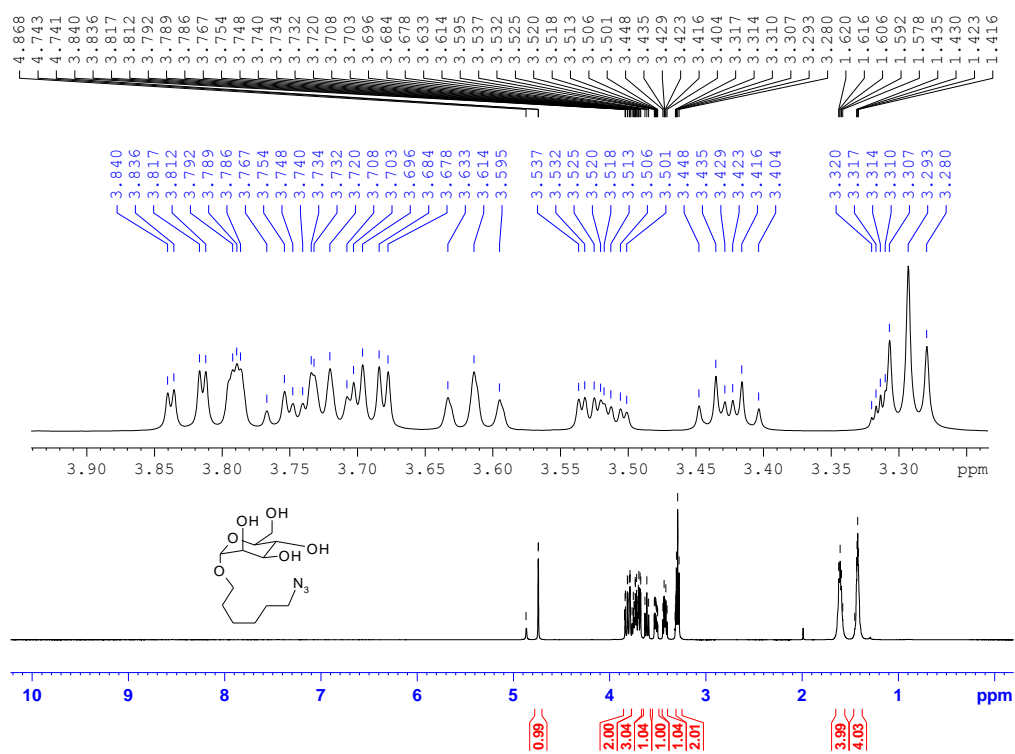

125.7 MHz  $^{13}\text{C}$  NMR spectrum of 6-azidohexyl  $\alpha$ -D-mannopyranoside (10) in methanol-*d*

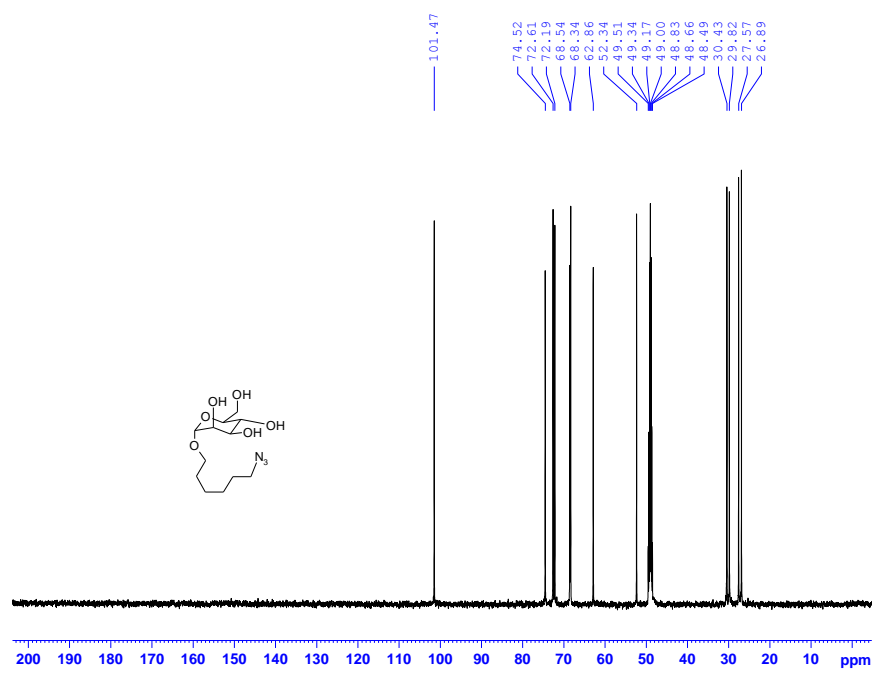



**125.7 MHz  $^{13}\text{C}$  NMR spectrum of methyl and benzyl-protected hydroquinone-cored first generation dendrimer (15) in chloroform- $d$**

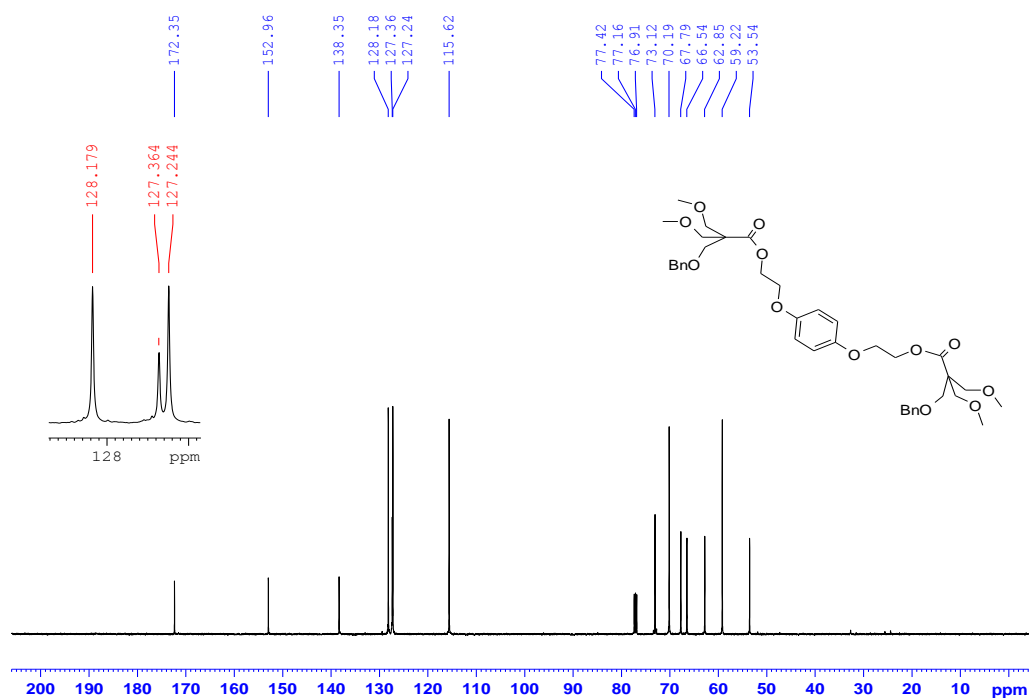

**500.13 MHz  $^1\text{H}$  NMR spectrum of hydroquinone-cored first generation dendrimer (16) in acetone- $d_6$**

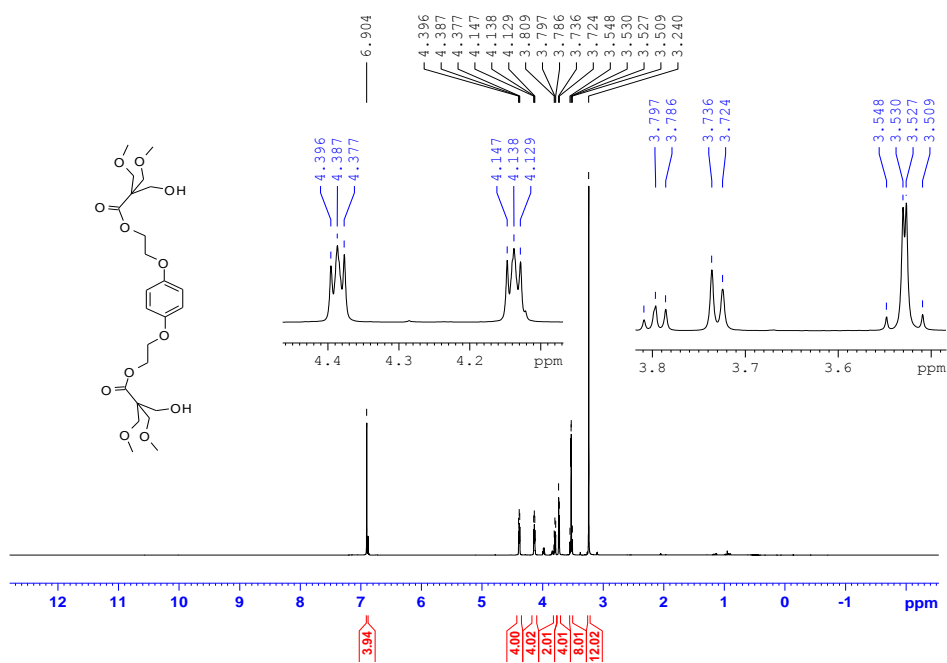

**500.13 MHz  $^1\text{H}$  NMR spectrum of bis(2-(3-hydroxy-2,2-bis-(methoxymethyl)propanoyloxy)-ethoxy)benzene (16) in acetone- $d_6$**

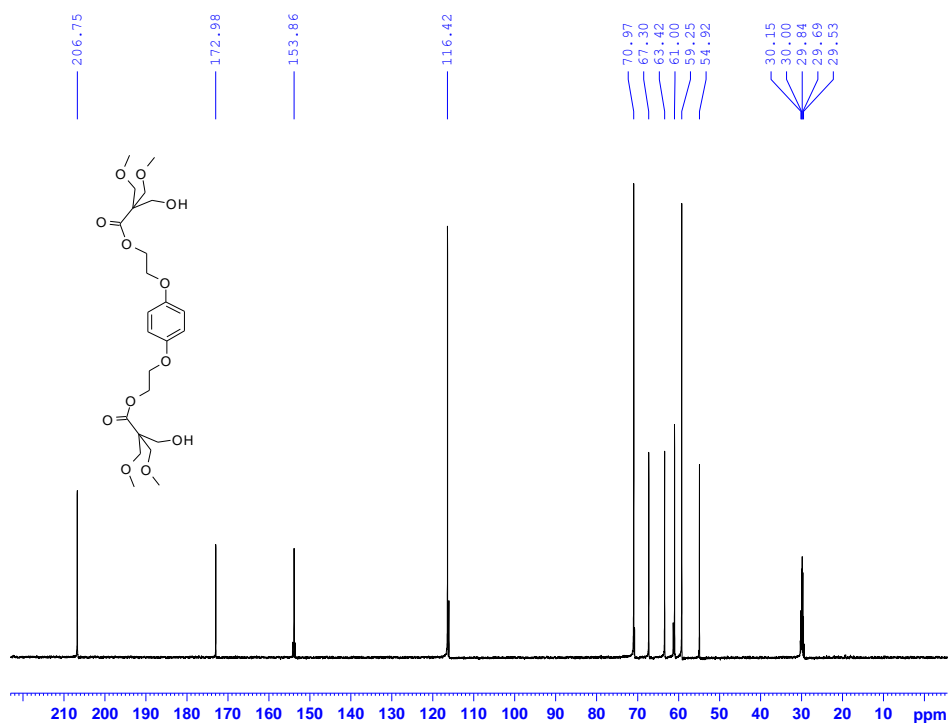

**300.15 MHz  $^1\text{H}$  NMR spectrum of azide-functionalized divalent first generation dendrimer (17) in chloroform- $d$**

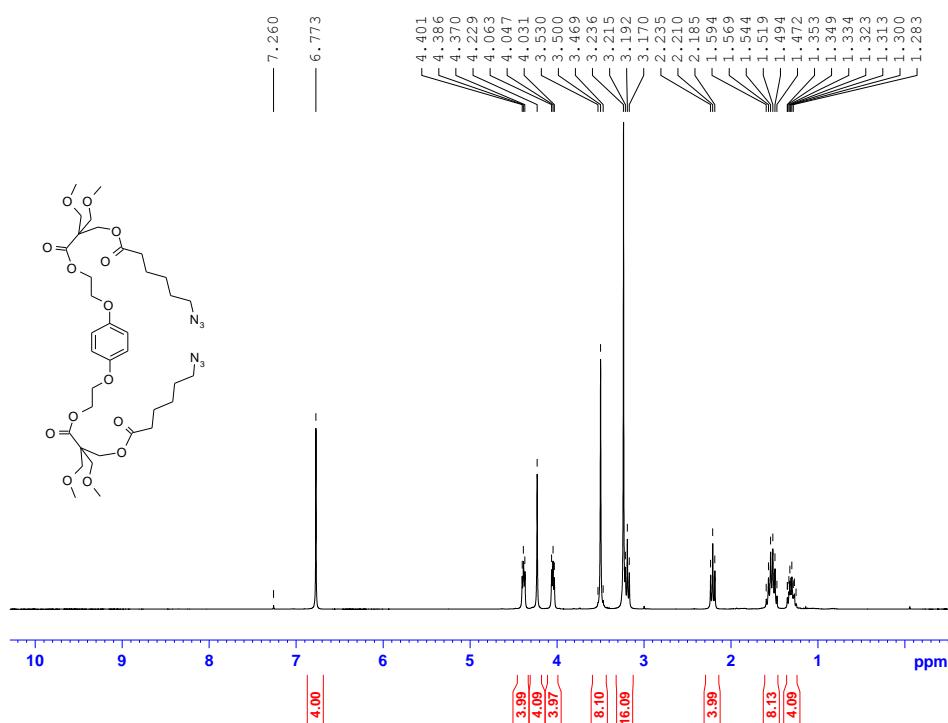

**Expansion of part of the 300.15 MHz  $^1\text{H}$  NMR spectrum of azide-functionalized divalent first generation dendrimer (17) in chloroform-*d***

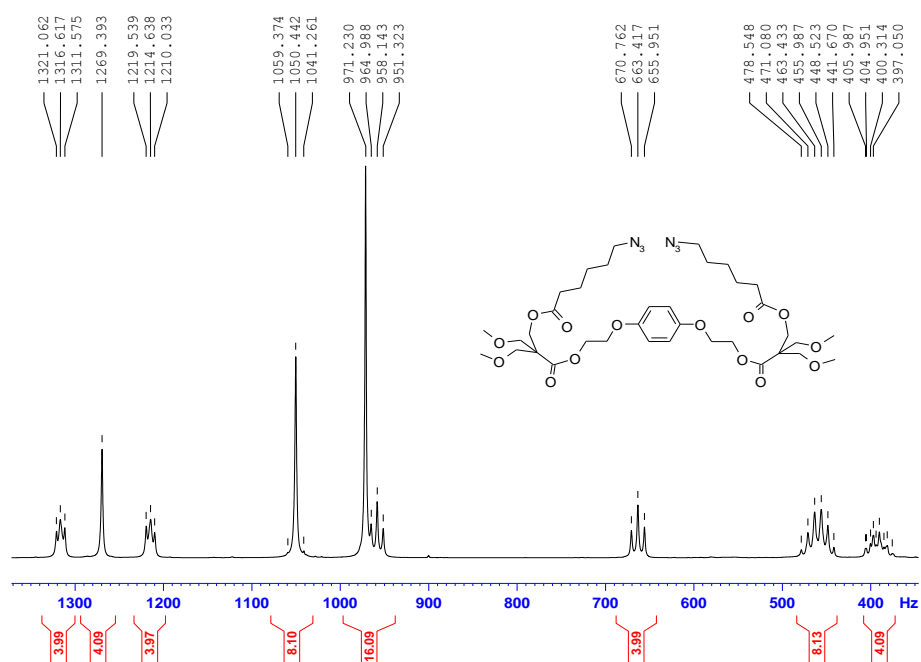

**75.5 MHz  $^{13}\text{C}$  NMR spectrum of azide-functionalized divalent first generation dendrimer (17) in chloroform-*d***

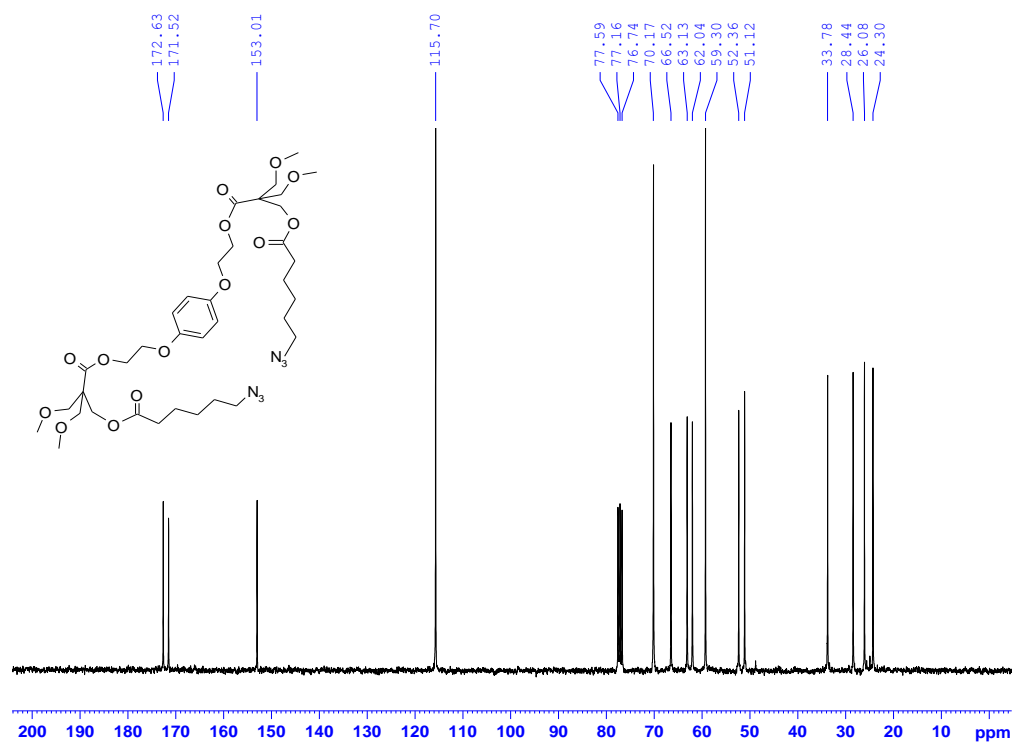



**125.7 MHz  $^{13}\text{C}$  NMR spectrum of benzyl-terminated divalent dendrimer (18) in chloroform- $d$** 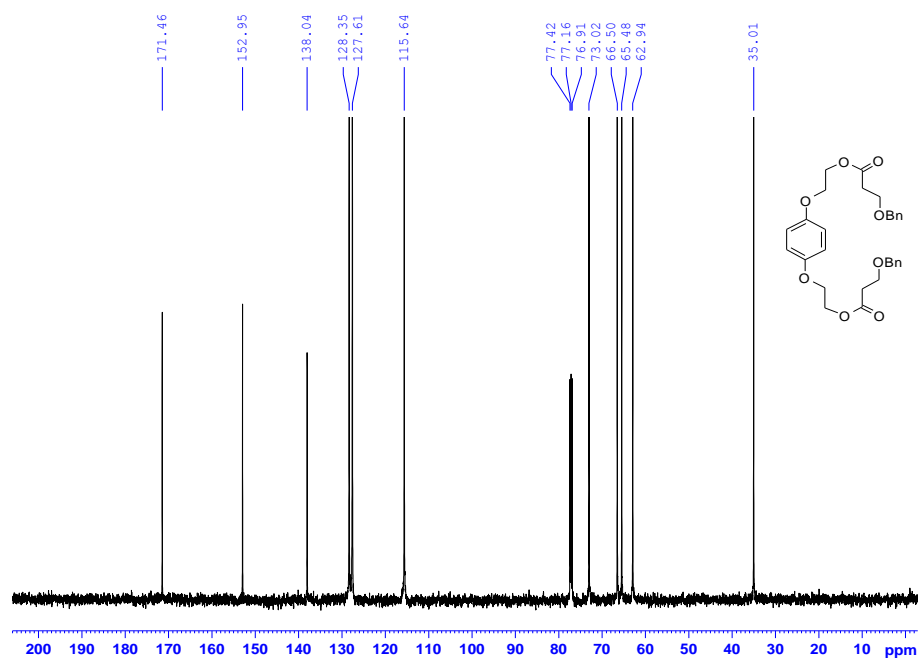**500.13 MHz  $^1\text{H}$  NMR spectrum of hydroxyl-terminated divalent dendrimer (19) in methanol- $d_4$** 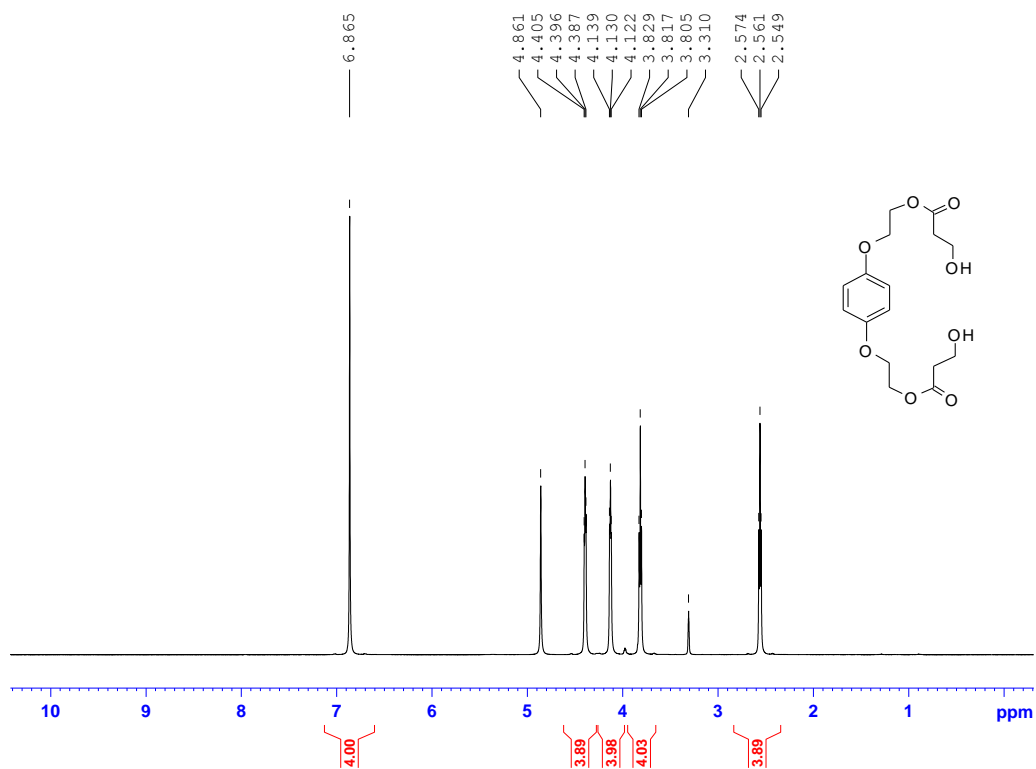



Expansion of part of the 500.13 MHz  $^1\text{H}$  NMR spectrum of hydroxyl-terminated divalent dendrimer (19) in methanol- $d_4$

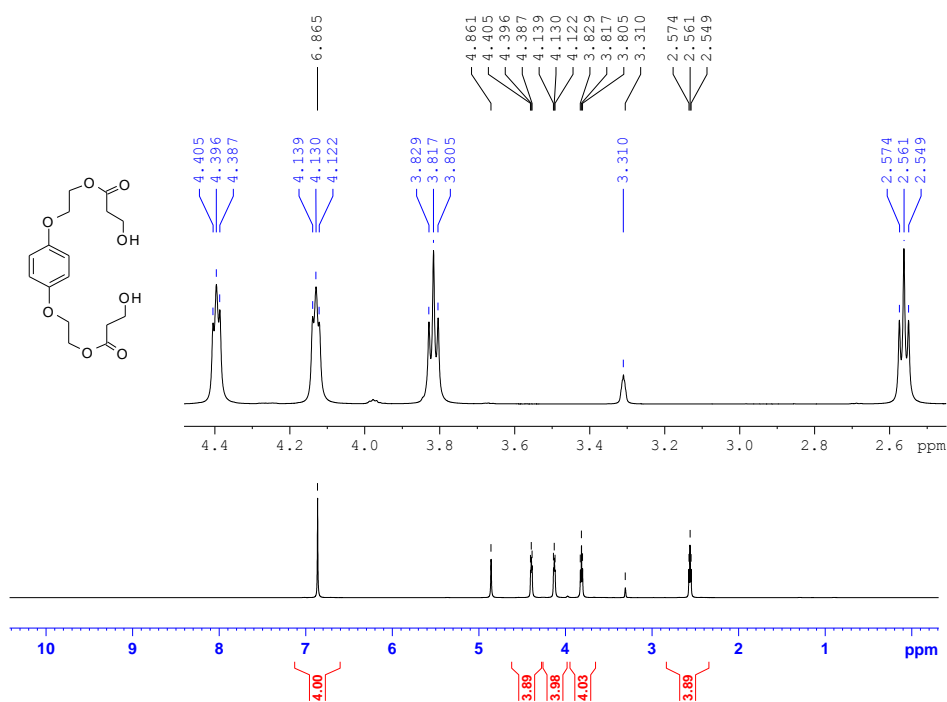

125.7 MHz  $^{13}\text{C}$  NMR spectrum of hydroxyl-terminated divalent dendrimer (19) in methanol- $d_4$

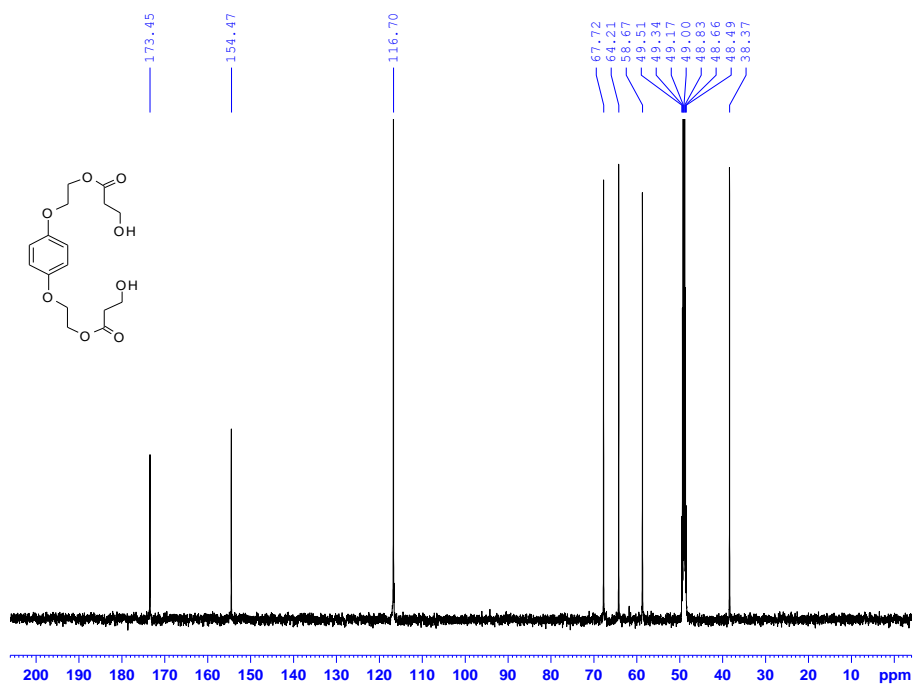

300.15 MHz  $^1\text{H}$  NMR spectrum of azide-functionalized divalent dendrimer (20) in chloroform-*d*

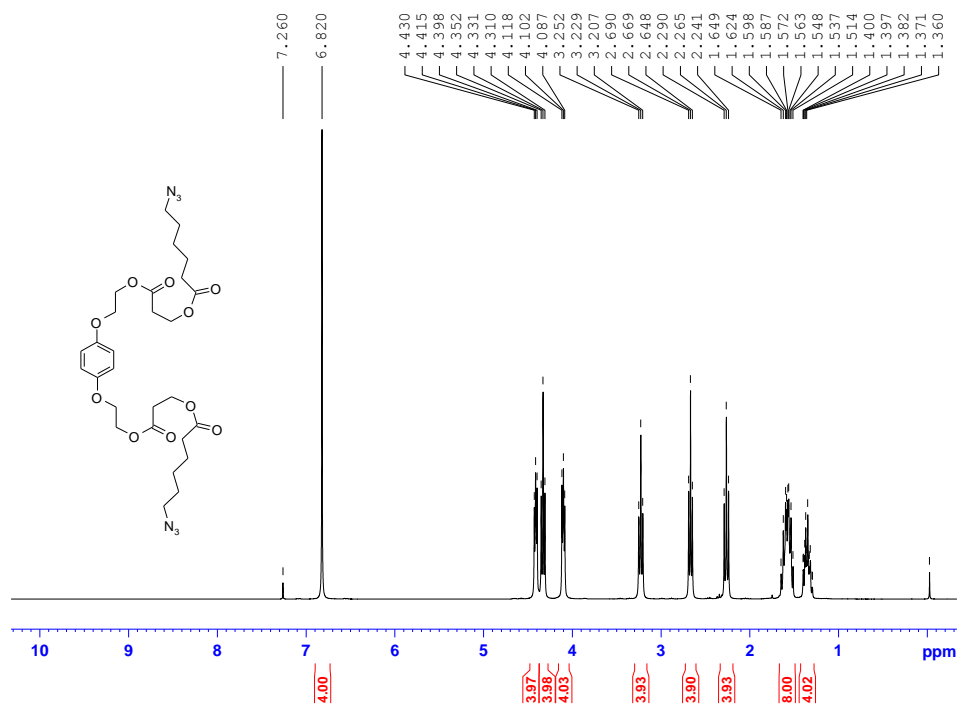

Expansion of part of the 300.15 MHz  $^1\text{H}$  NMR spectrum of azide-functionalized divalent dendrimer (20) in chloroform-*d*

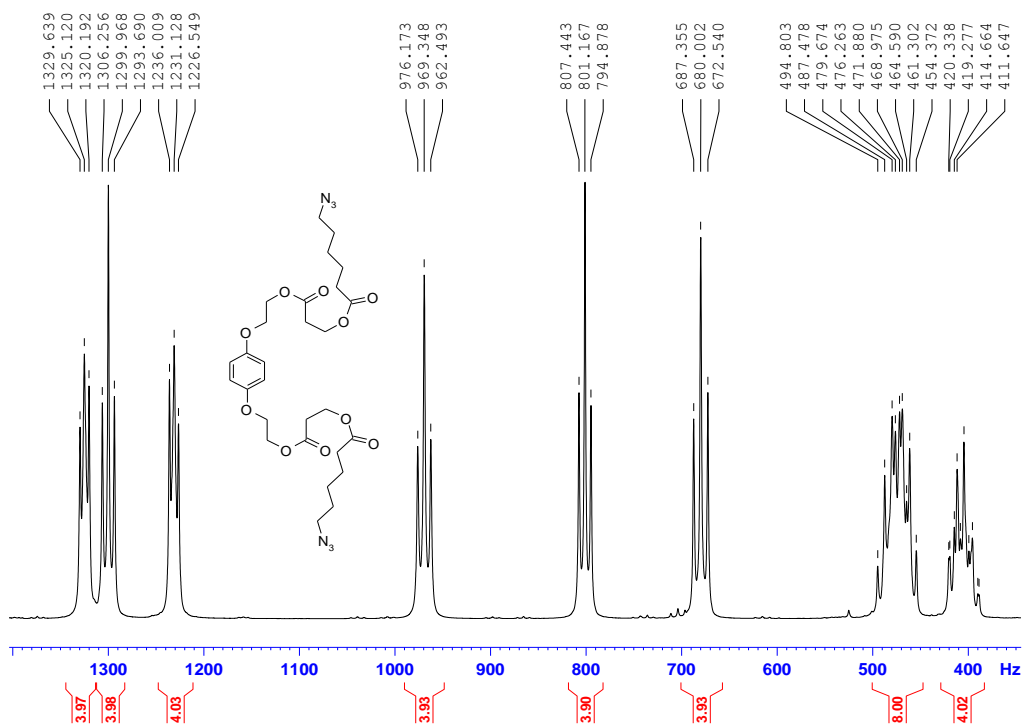

75.5  $^{13}\text{C}$  NMR spectrum of azide-functionalized divalent dendrimer (20) in chloroform-*d*

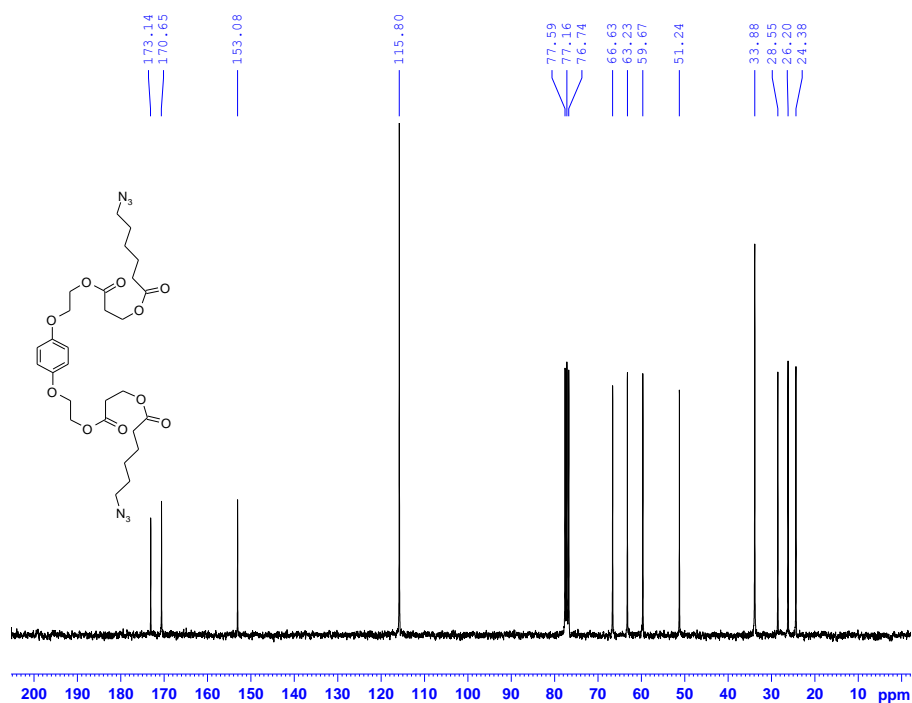

500.13 MHz  $^1\text{H}$  NMR spectrum of benzylidene-protected hydroquinone-cored third generation dendrimer (23) in chloroform-*d*

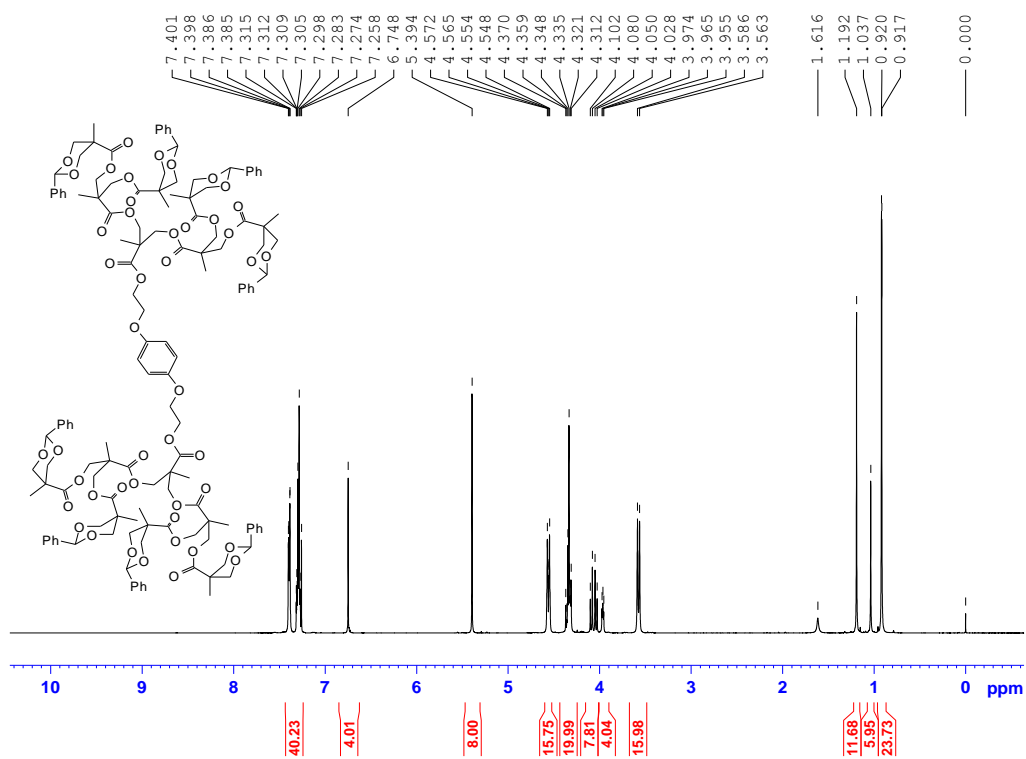

**Expansion of part of the 500.13 MHz  $^1\text{H}$  NMR spectrum of benzylidene-protected hydroquinone-cored third generation dendrimer (23) in chloroform-*d***

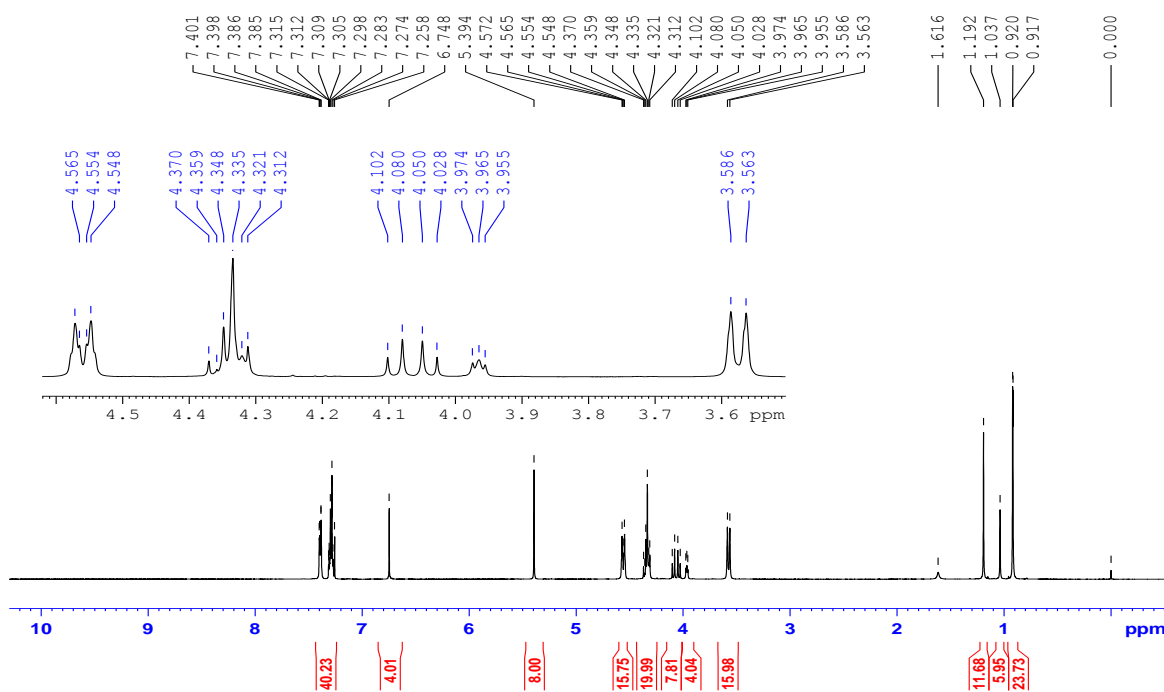

**125.7 MHz  $^{13}\text{C}$  NMR spectrum of benzylidene-protected hydroquinone-cored third generation dendrimer (23) in chloroform-*d***

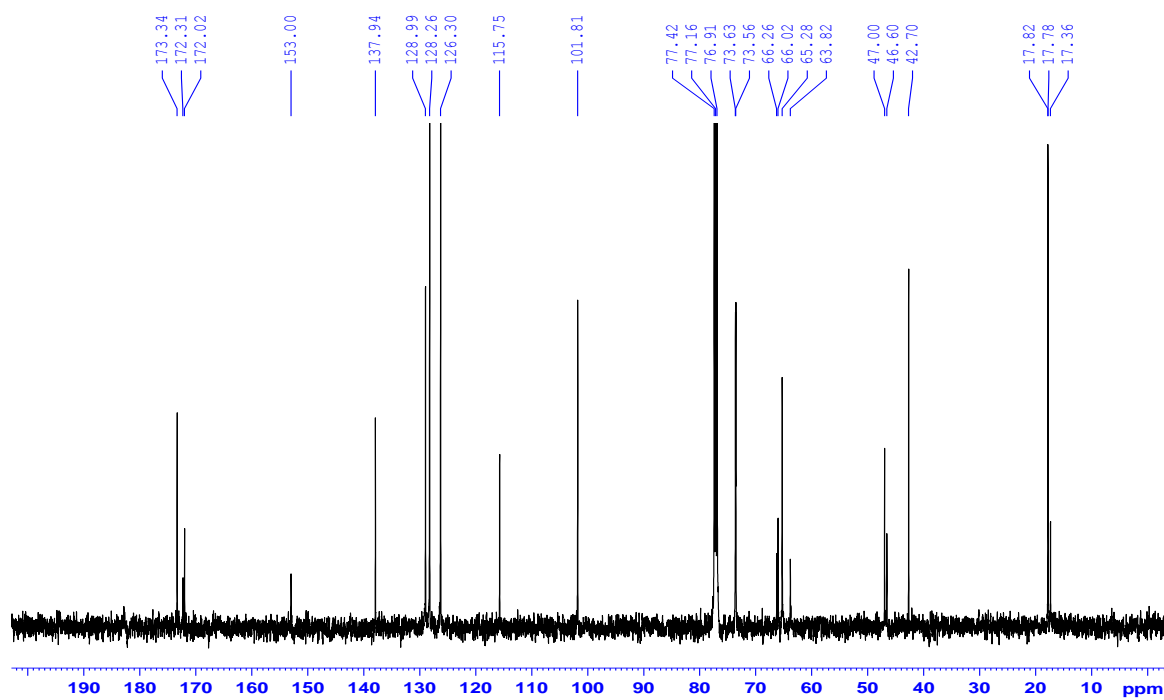

Expansions of parts of the 125.7 MHz  $^{13}\text{C}$  NMR spectrum of benzylidene-protected hydroquinone-cored third generation dendrimer (23) in chloroform-*d*

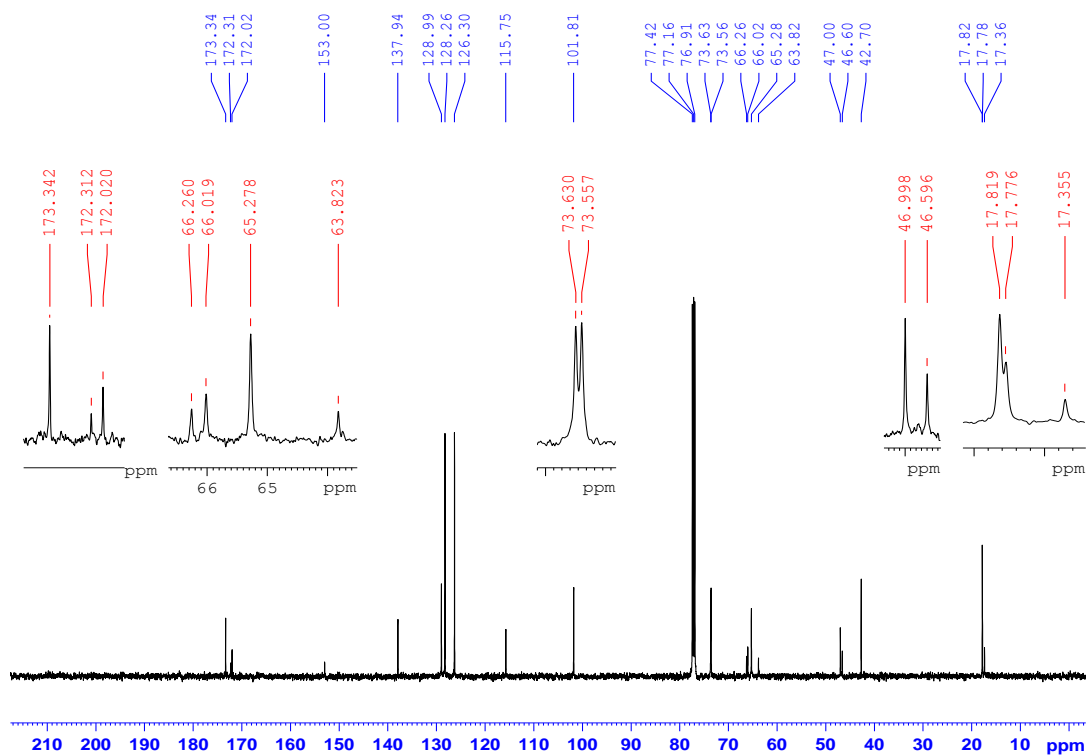

500.13 MHz  $^1\text{H}$  NMR spectrum of third generation dendrimer (24) in DMSO-*d*<sub>6</sub>

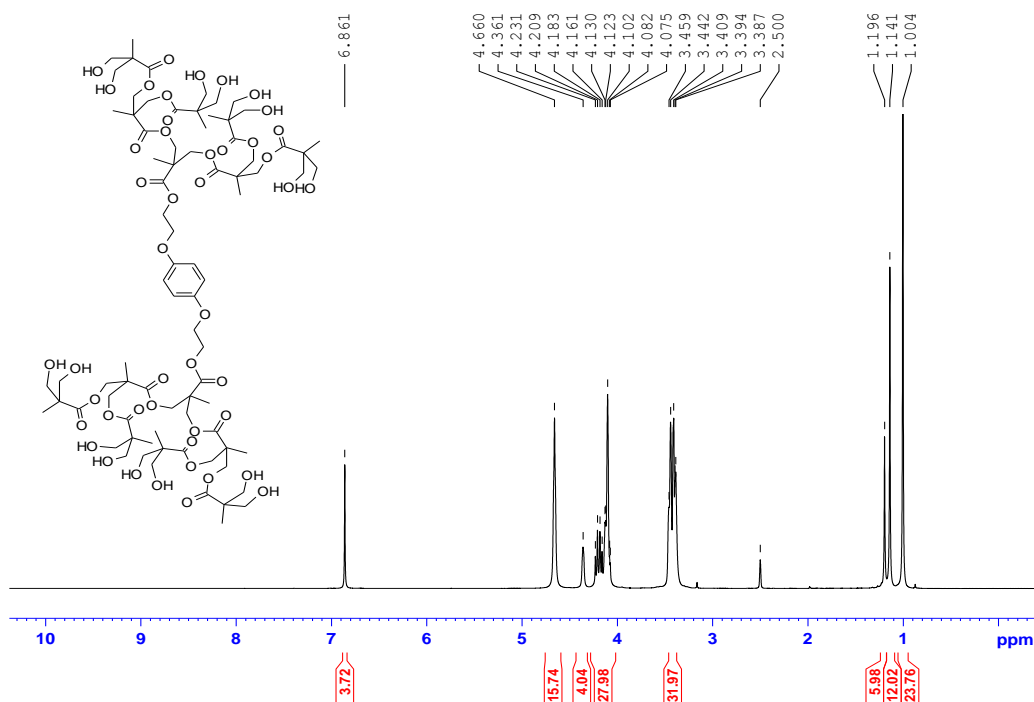

Expansion of part of the 500.13 MHz  $^1\text{H}$  NMR spectrum of third generation dendrimer (24) in  $\text{DMSO-}d_6$

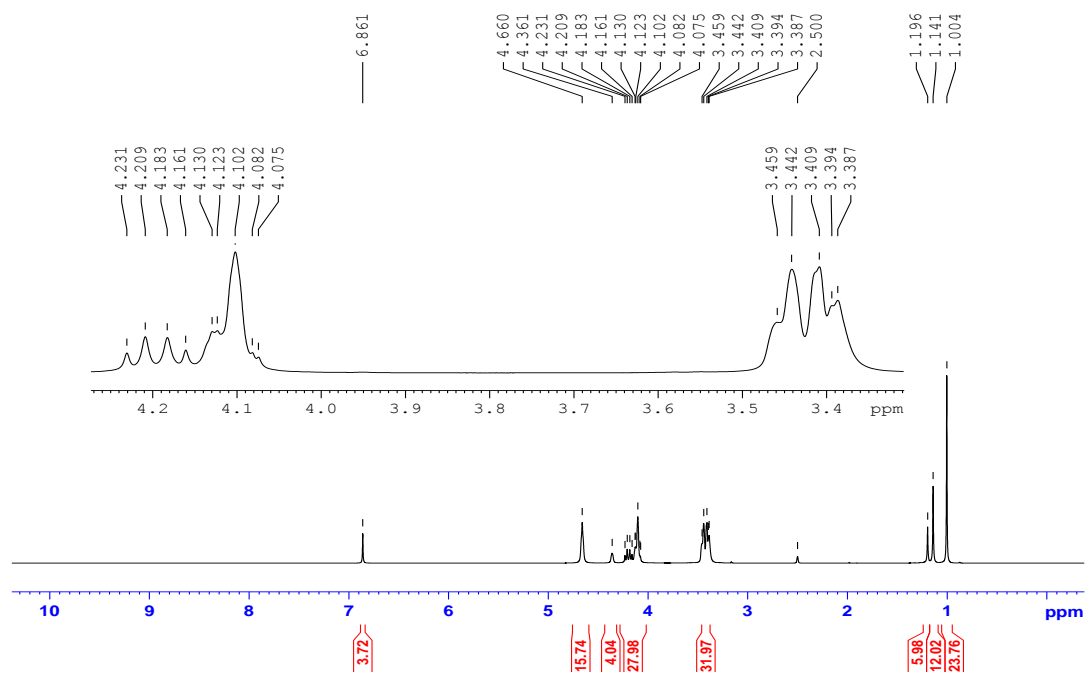

125.7 MHz  $^{13}\text{C}$  NMR spectrum of third generation dendrimer (24) in  $\text{DMSO-}d_6$

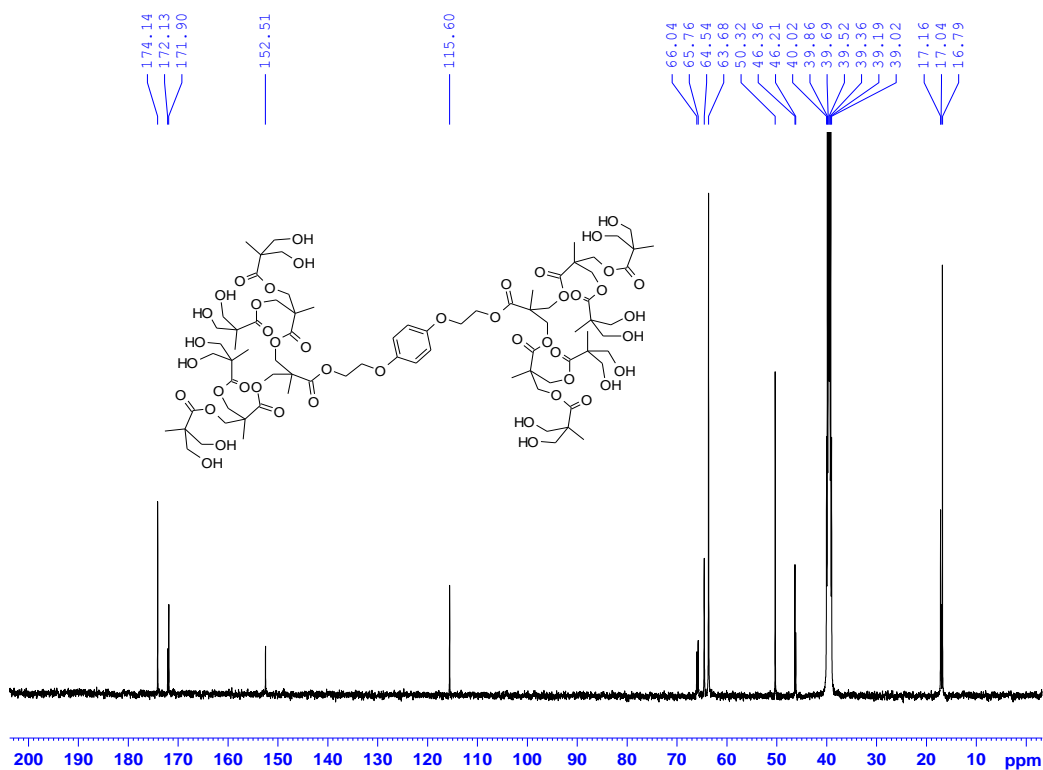

**500.13 MHz  $^1\text{H}$  NMR spectrum of azide-functionalized hydroquinone-cored third generation dendrimer (25) in chloroform-*d***

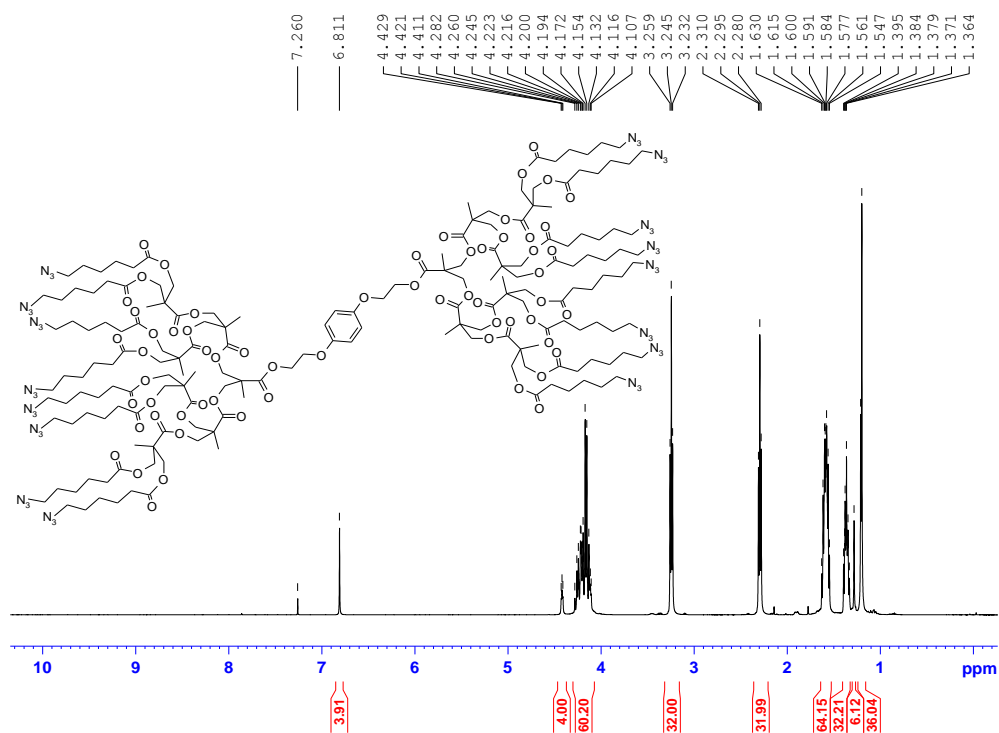

**Expansions of parts of the 500.13 MHz  $^1\text{H}$  NMR spectrum of azide-functionalized hydroquinone-cored third generation dendrimer (25) in chloroform-*d***

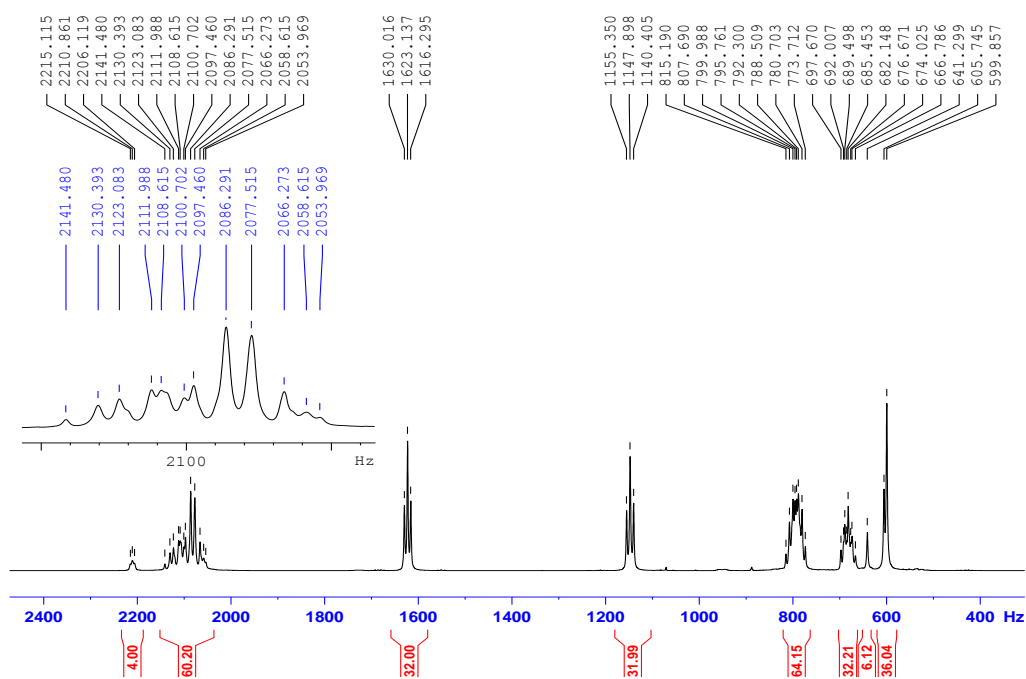

**125.7 MHz  $^{13}\text{C}$  NMR spectrum of azide-functionalized hydroquinone-cored third generation dendrimer (25) in chloroform-*d***

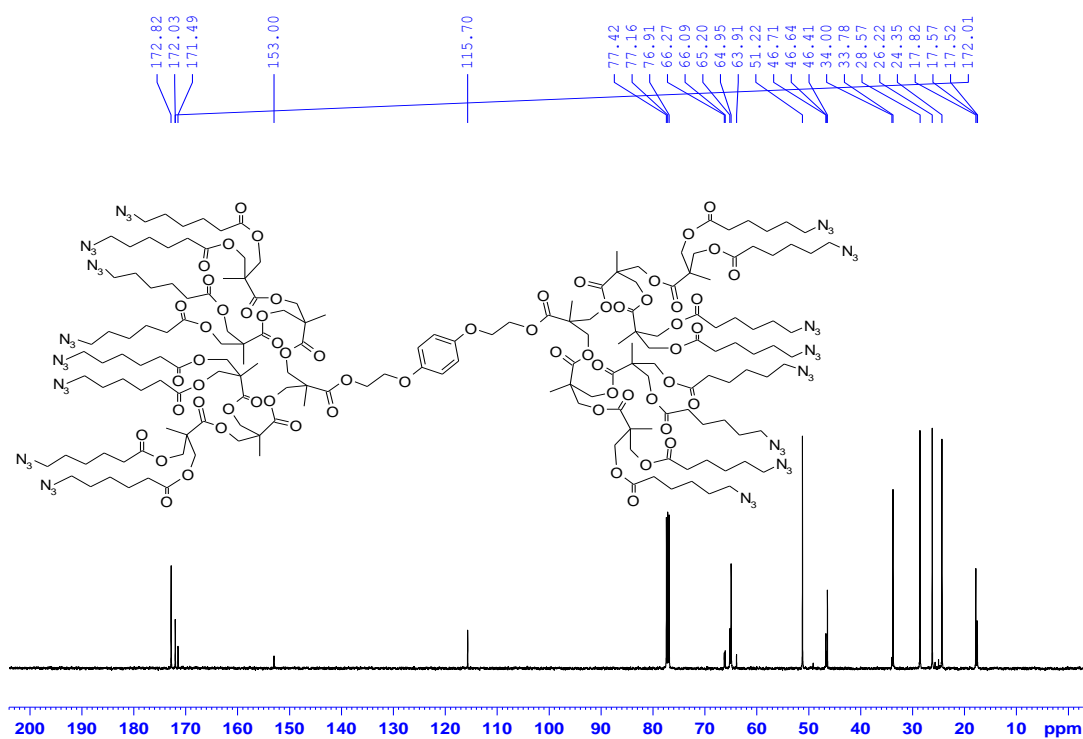

**Expansions of the 125.7 MHz  $^{13}\text{C}$  NMR spectrum of azide-functionalized hydroquinone-cored third generation dendrimer (25) in chloroform-*d***

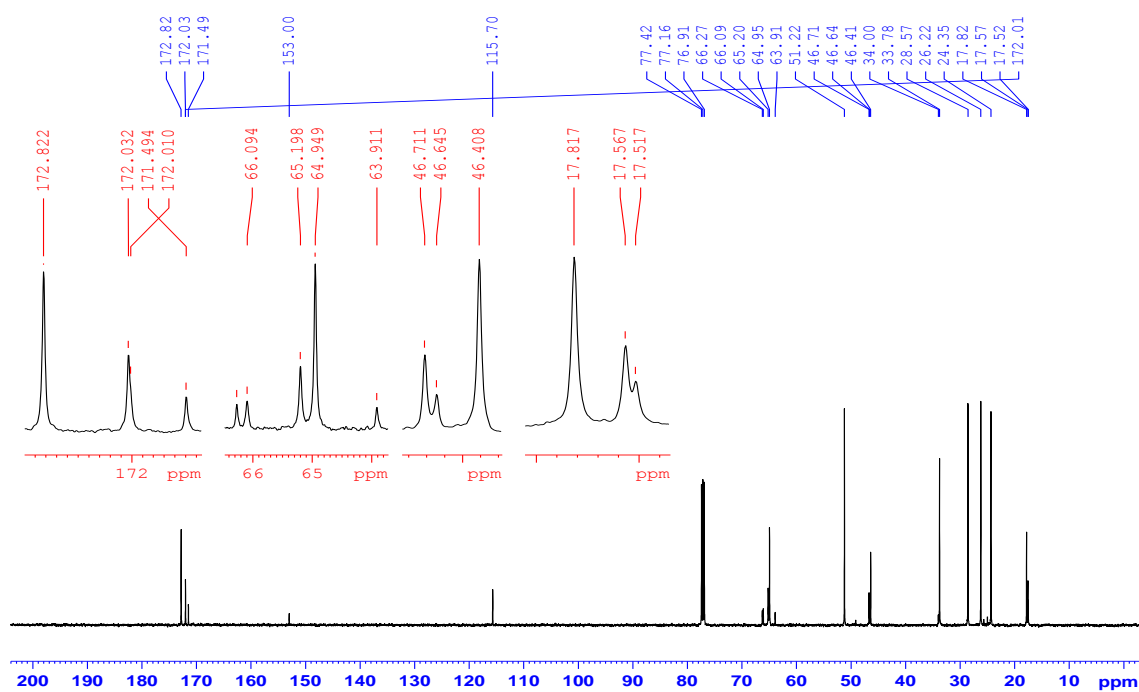



**500.13 MHz  $^1\text{H}$  NMR spectrum of extended divalent  $\alpha$ -D-mannopyranoside-terminated dendrimer (27) in methanol- $d_4$**

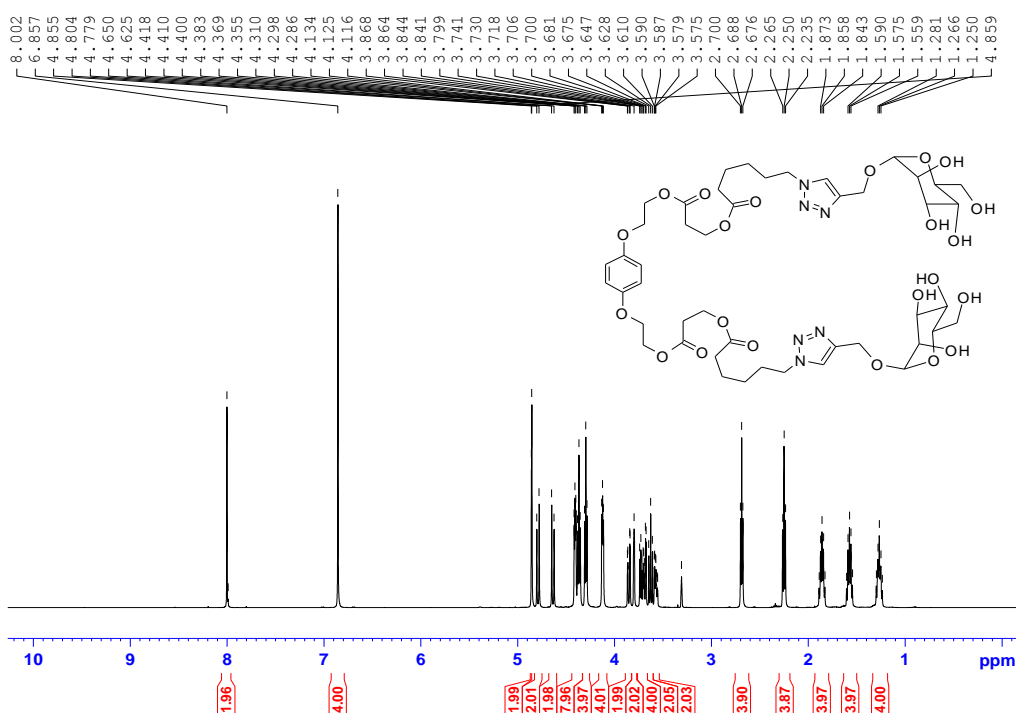

**Expansion of part of the 500.13 MHz  $^1\text{H}$  NMR spectrum of extended divalent  $\alpha$ -D-mannopyranoside-terminated dendrimer (27) in methanol- $d_4$**

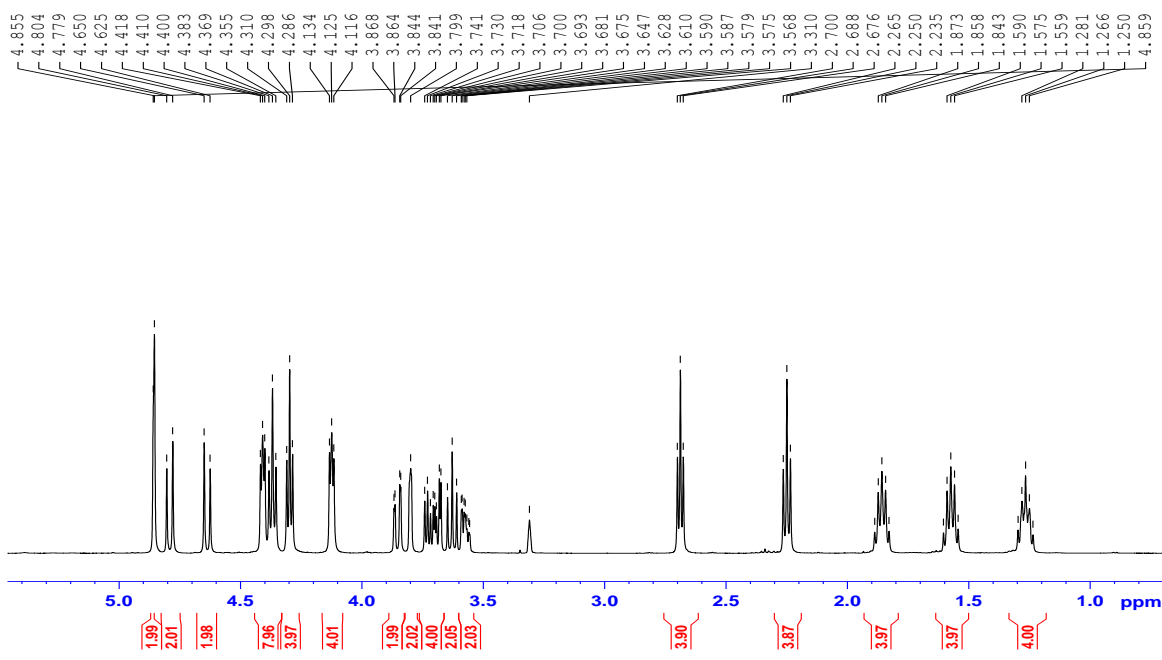

**125.7 MHz  $^{13}\text{C}$  NMR spectrum of extended divalent  $\alpha$ -D-mannopyranoside-terminated dendrimer (27) in methanol- $d_4$**

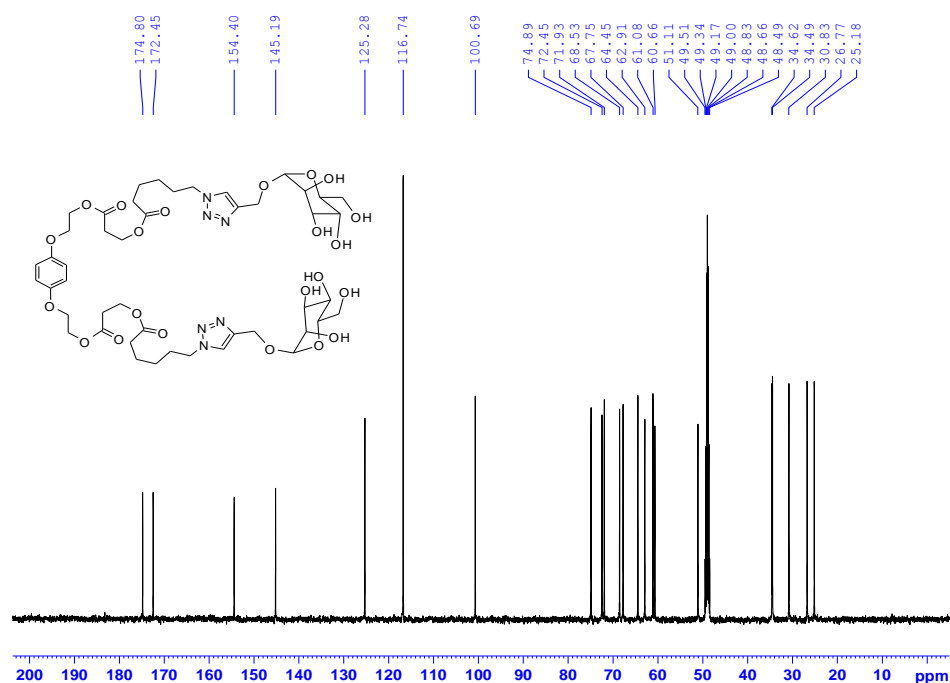

**Expansion of part of the 125.7 MHz  $^{13}\text{C}$  NMR spectrum of extended divalent  $\alpha$ -D-mannopyranoside-terminated dendrimer (27) in methanol- $d_4$**

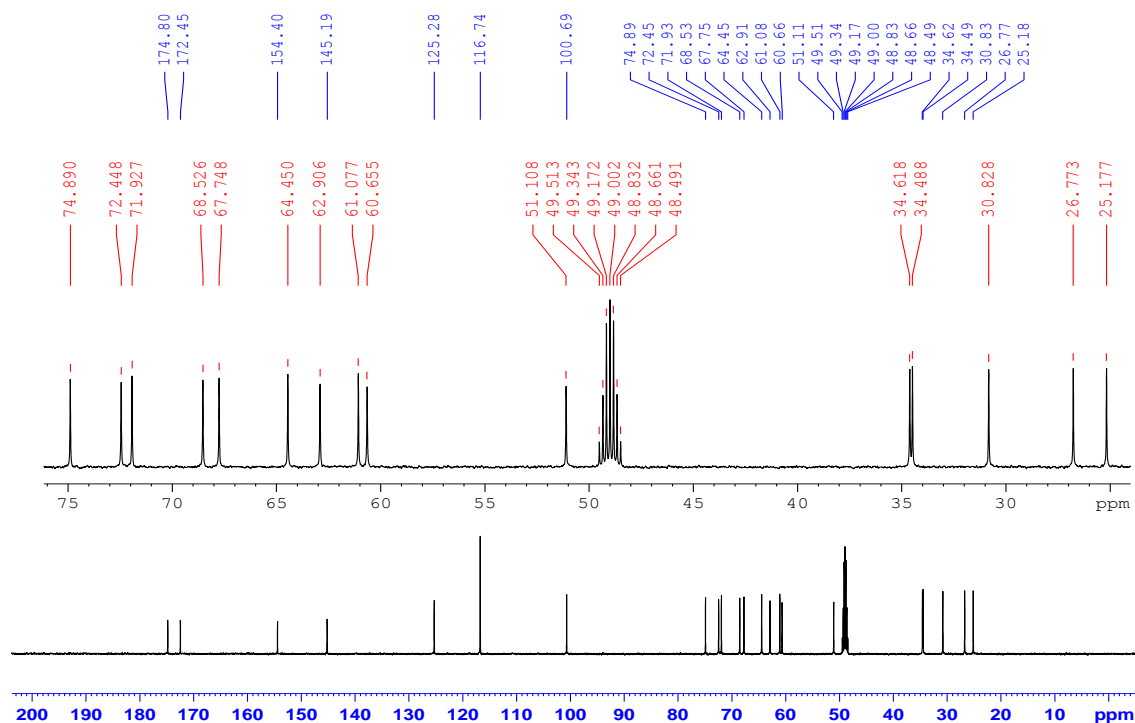

**500.13 MHz  $^1\text{H}$  NMR spectrum of third generation dendrimer bearing 16 mannose residues (28) in water- $d_2$**

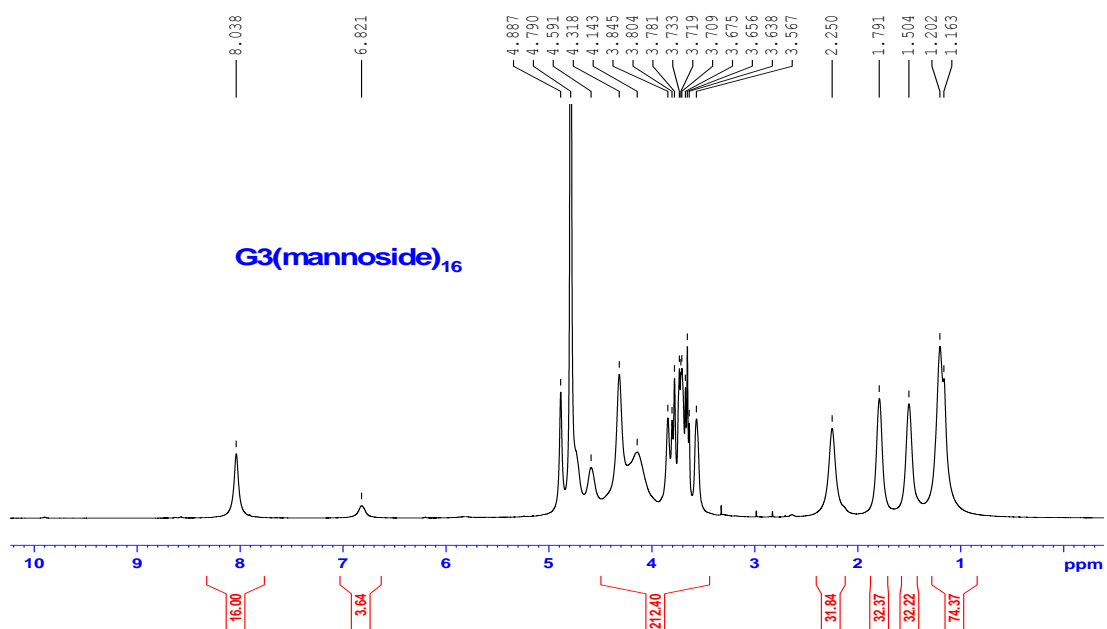

**125.7 MHz  $^{13}\text{C}$  NMR spectrum of third generation dendrimer bearing 16 mannose residues (28) in water- $d_2$**

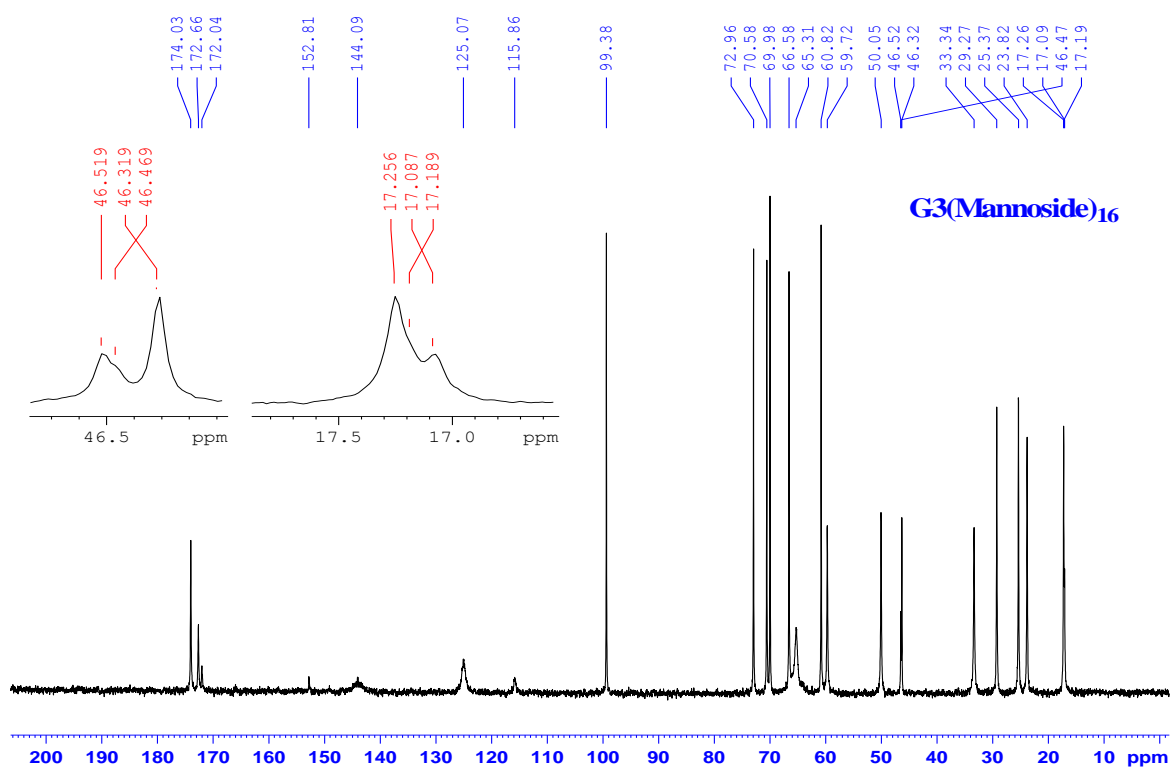

**500.13 MHz  $^1\text{H}$  NMR spectrum of bis(2-(2-propynyloxy)ethoxy)benzene (29) in chloroform-*d***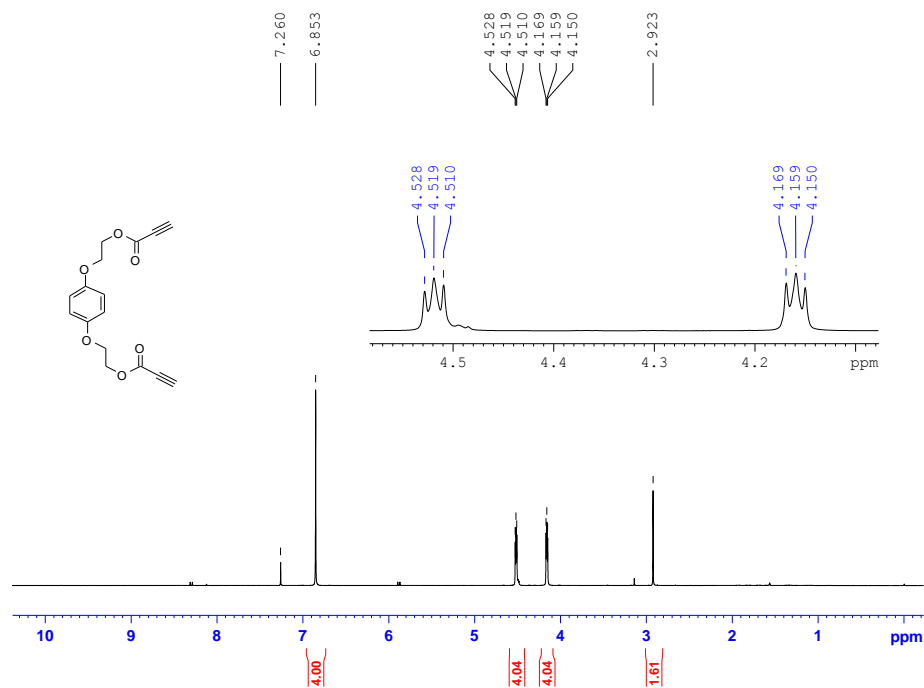**125.7 MHz  $^{13}\text{C}$  NMR spectrum of bis(2-(2-propynyloxy)ethoxy)benzene (29) in chloroform-*d***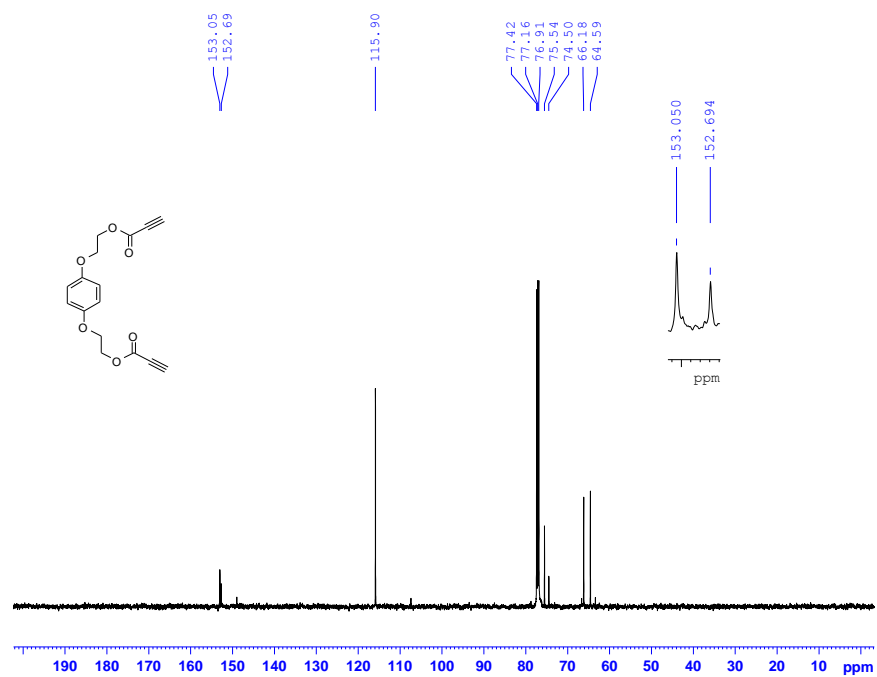

**500.13 MHz  $^1\text{H}$  NMR spectrum of divalent  $\alpha$ -D-mannopyranoside-terminated dendrimer with a hexyl linker (30) in DMSO- $d_6$ / methanol- $d_4$**

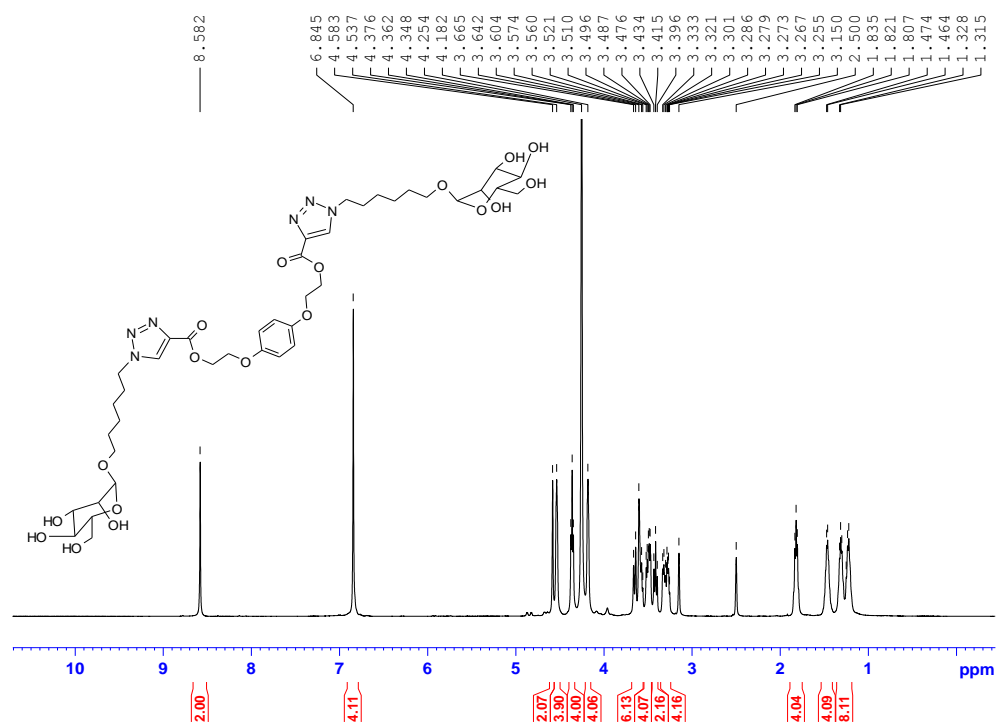

**Expansion of part of the 500.13 MHz  $^1\text{H}$  NMR spectrum of divalent  $\alpha$ -D-mannopyranoside-terminated dendrimer with a hexyl linker (30) in DMSO- $d_6$ / methanol- $d_4$**

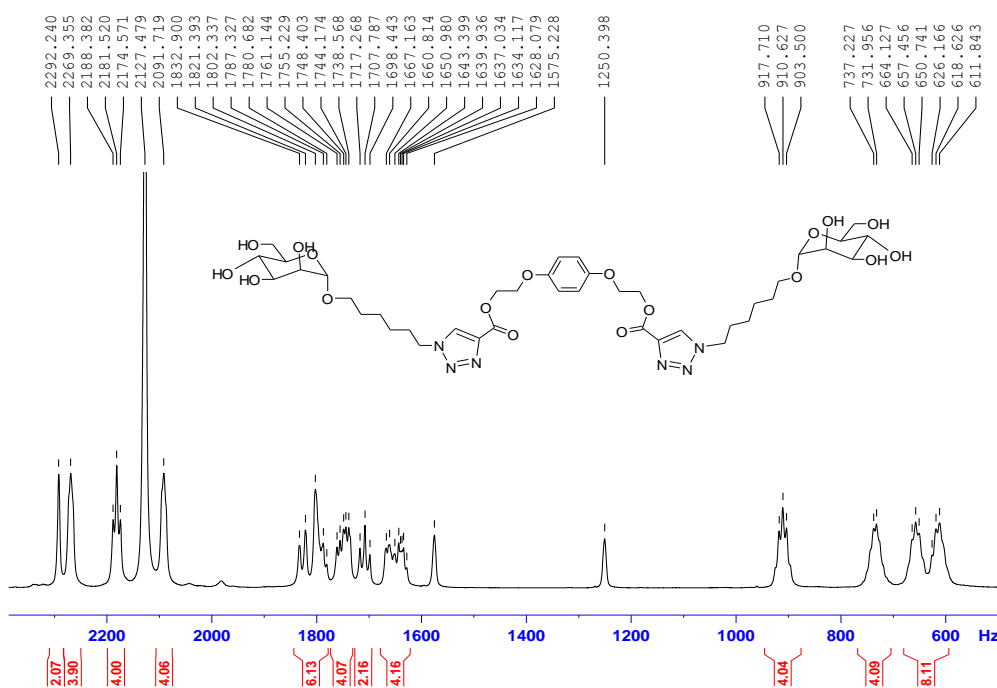

**125.7 MHz  $^{13}\text{C}$  NMR spectrum of divalent  $\alpha$ -D-mannopyranoside-terminated dendrimer with a hexyl linker (30) in DMSO- $d_6$ / methanol- $d_4$**

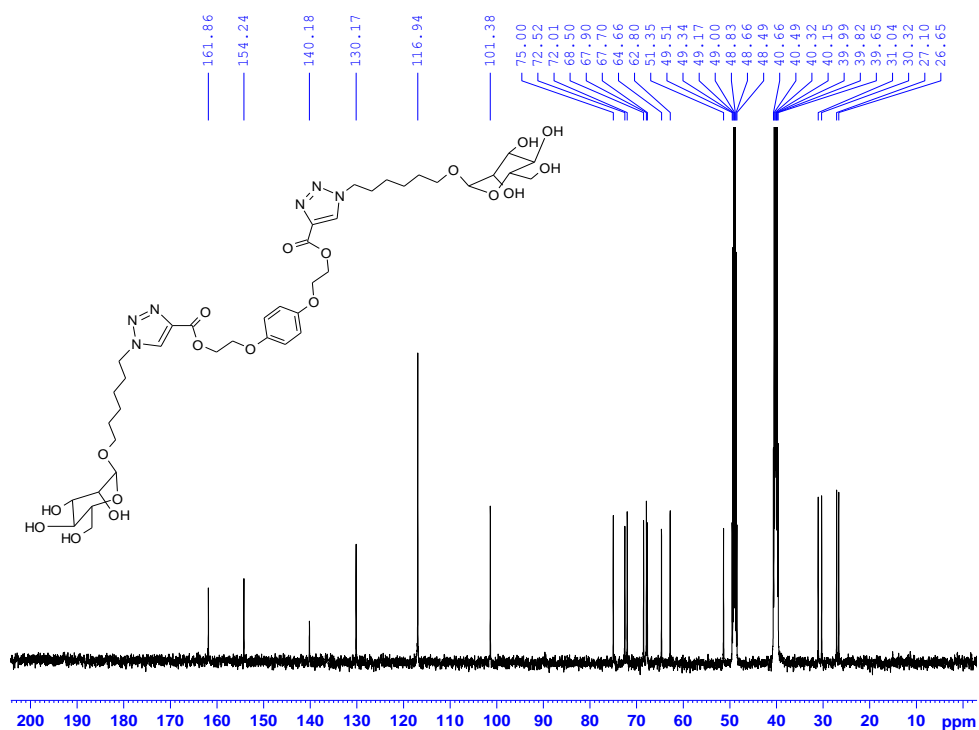

**125.7 MHz  $^{13}\text{C}$  NMR spectrum of divalent  $\alpha$ -D-mannopyranoside-terminated dendrimer with a hexyl linker (30) in DMSO- $d_6$ / methanol- $d_4$**

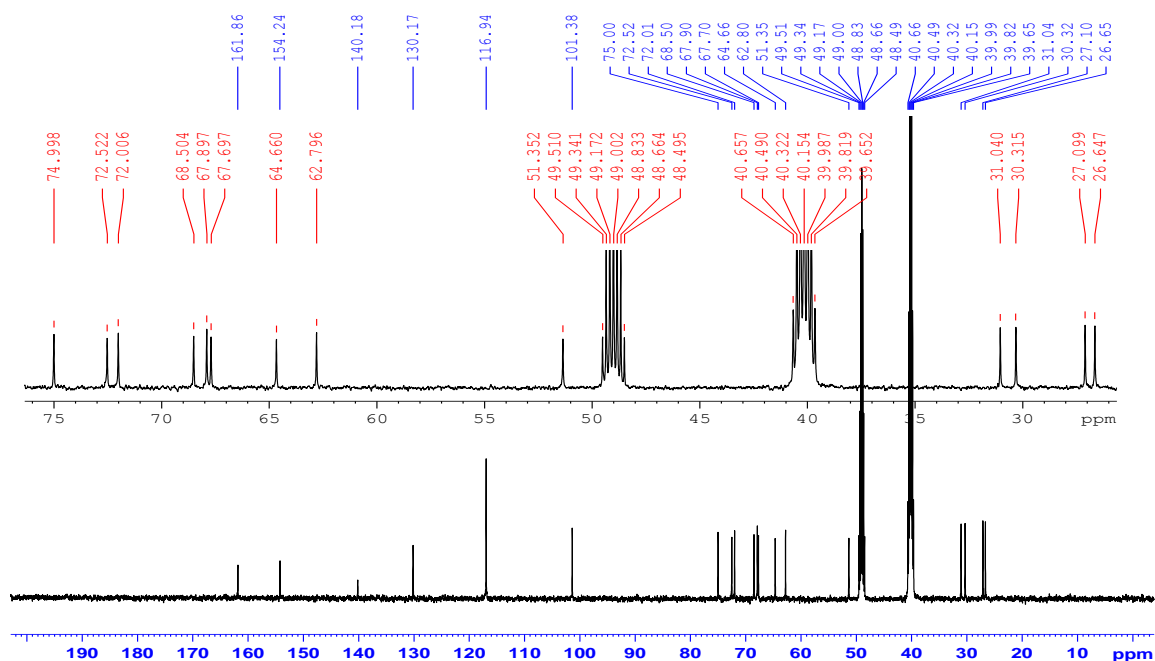

500.13 MHz  $^1\text{H}$  NMR spectrum of 2,2'-bis-(2-propynyloxymethyl)propanoic acid (**31**) in chloroform-*d*

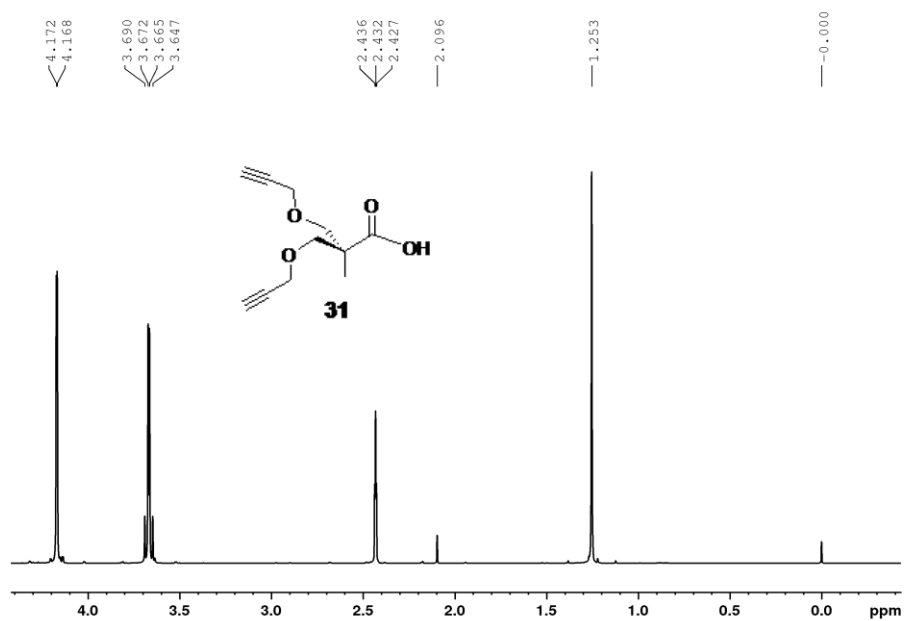

Expansion of part of the 500.13 MHz  $^1\text{H}$  NMR spectrum of 2,2'-bis-(2-propynyloxymethyl)propanoic acid (**31**) in chloroform-*d*

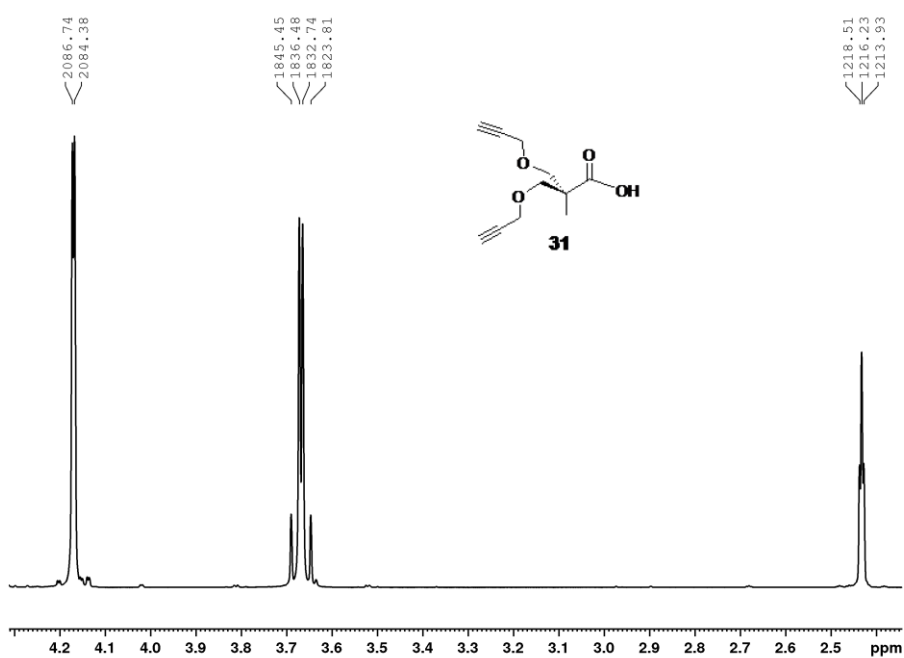

125.7 MHz  $^{13}\text{C}$  NMR spectrum of 2,2'-bis-(2-propynyloxymethyl)propanoic acid (31) in chloroform-*d*

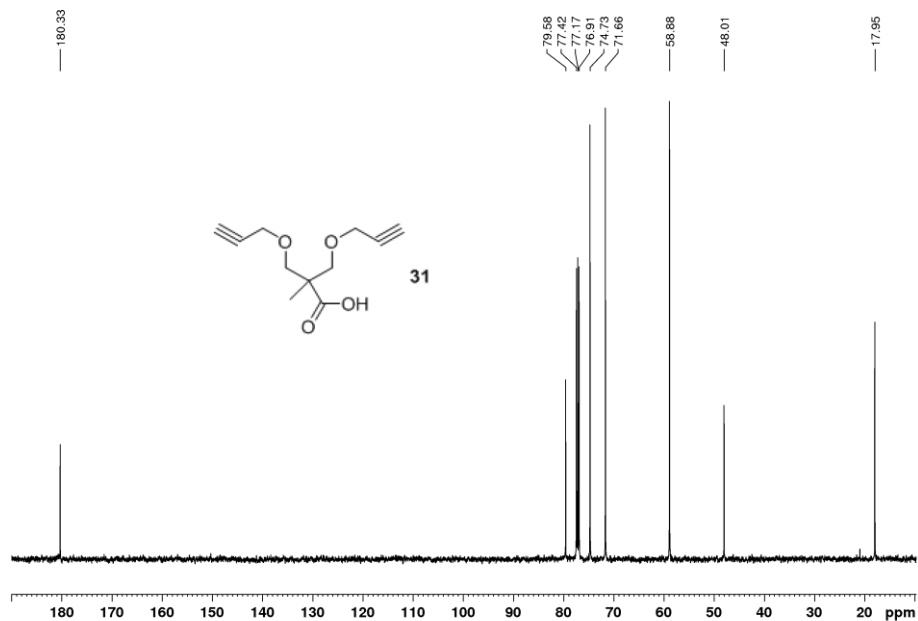

500.13 MHz  $^1\text{H}$  NMR spectrum of 2,2'-bis-(2-propynyloxymethyl)propanoic anhydride (32) in chloroform-*d*

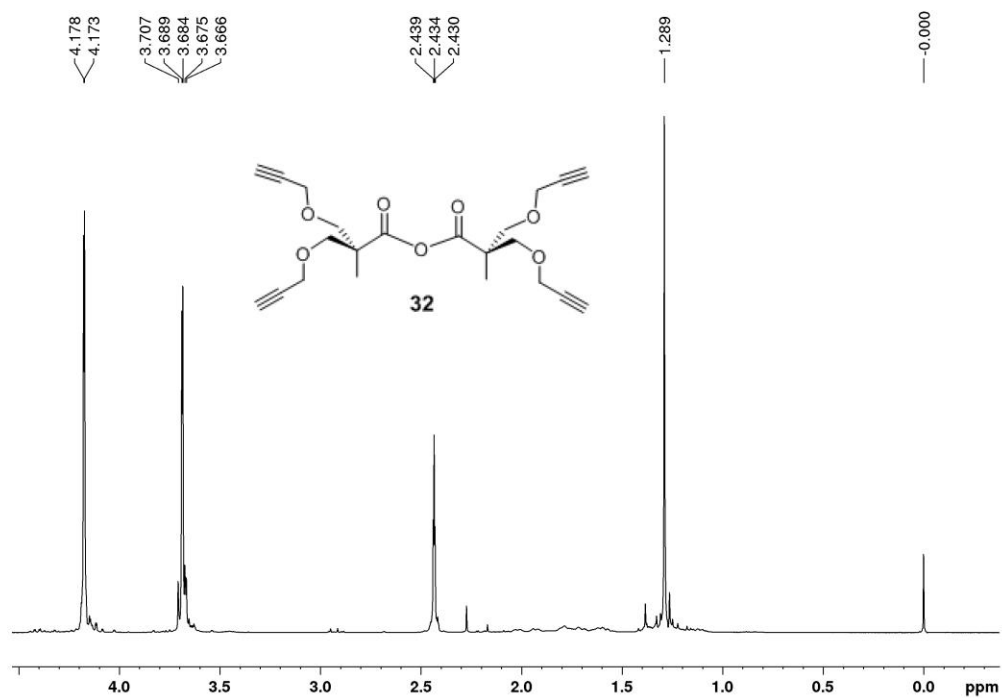



Expansion of part of the 500.13 MHz  $^1\text{H}$  NMR spectrum of 2,2'-bis-(2-propynyloxymethyl)propanoyl anhydride (**32**) in chloroform-*d*

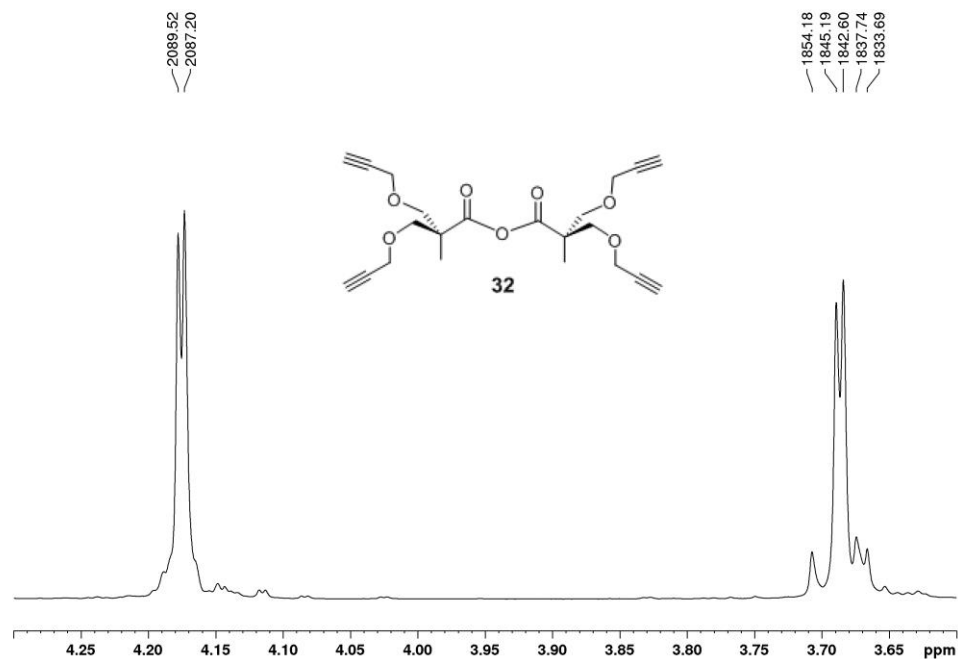

125.7 MHz  $^{13}\text{C}$  NMR spectrum of 2,2'-bis-(2-propynyloxymethyl)propanoyl anhydride (**32**) in chloroform-*d*

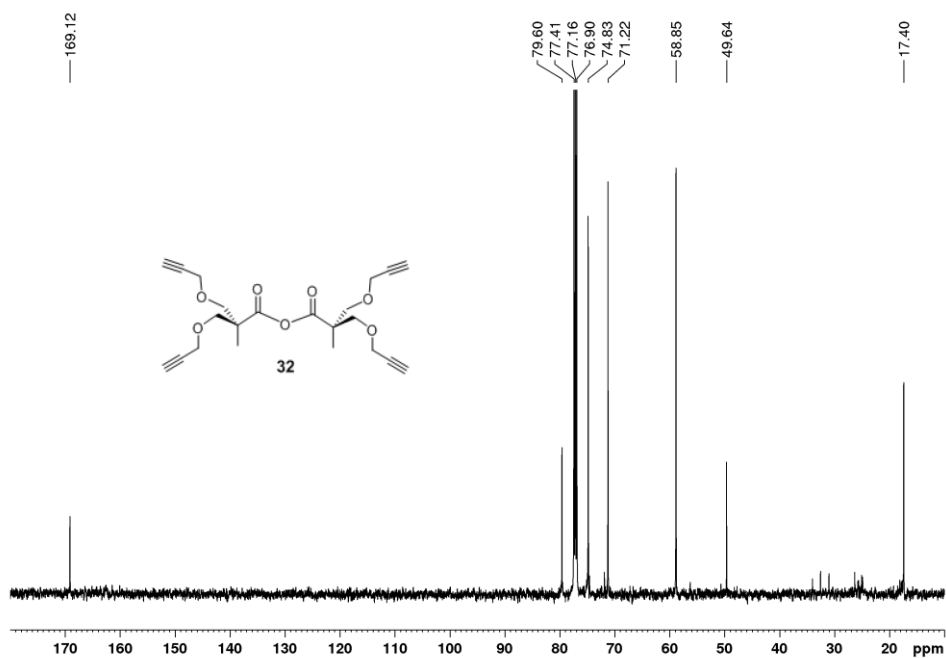

**500.13 MHz  $^1\text{H}$  NMR spectrum of 1,4-bis-2-(2,2'-bis-(2-propynyloxy)methyl)-propanoyloxy)ethoxy)benzene (33) in chloroform-*d***

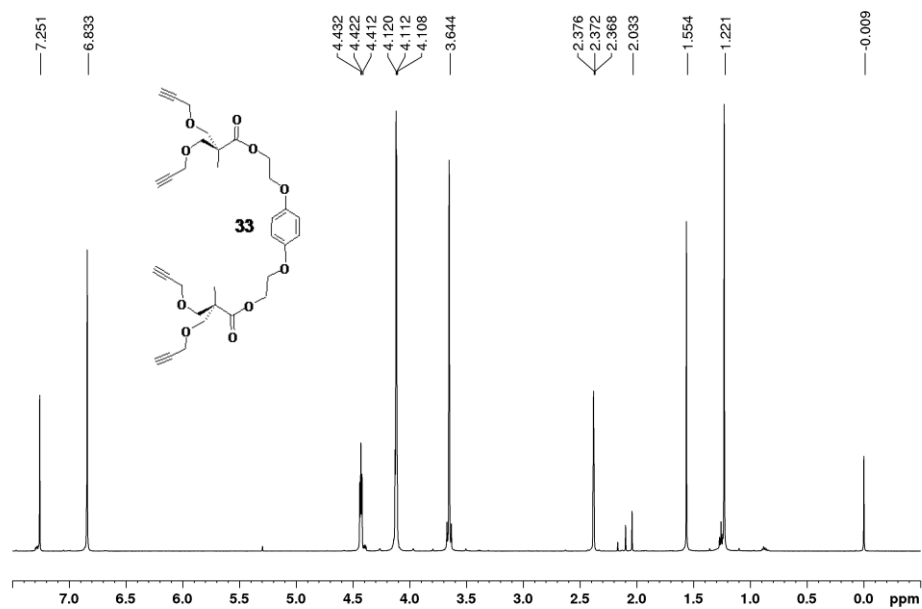

**Expansion of part of the 500.13 MHz  $^1\text{H}$  NMR spectrum of 1,4-bis-2-(2,2'-bis-(2-propynyloxy)methyl)-propanoyloxy)ethoxy)benzene (33) in chloroform-*d***

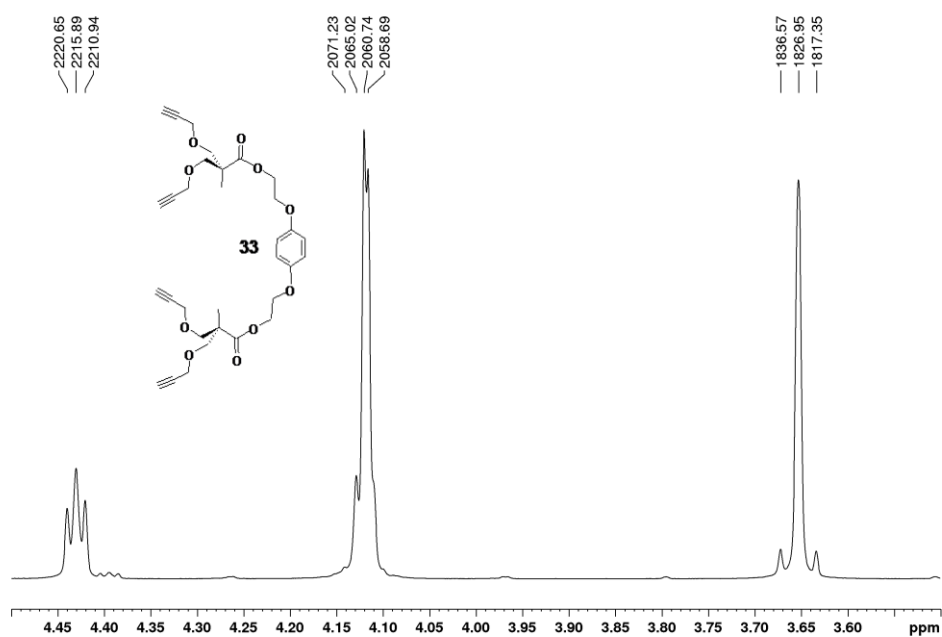

125.7 MHz  $^{13}\text{C}$  NMR spectrum of 1,4-bis-2-(2,2'-bis-(2-propynyloxy)methyl)propanoyloxy)-ethoxybenzene (**33**) in chloroform-*d*

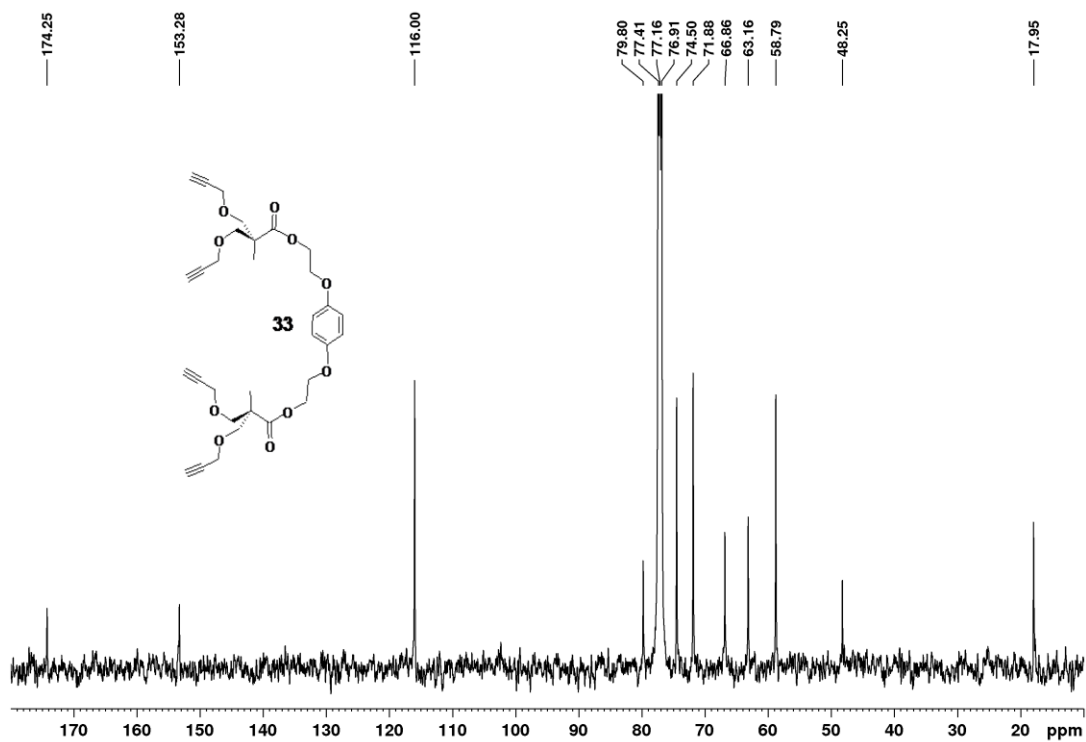

500.13 MHz  $^1\text{H}$  NMR spectrum of tetramannoside polyester dendrimer (**34**) in dimethyl sulfoxide- $d_6$

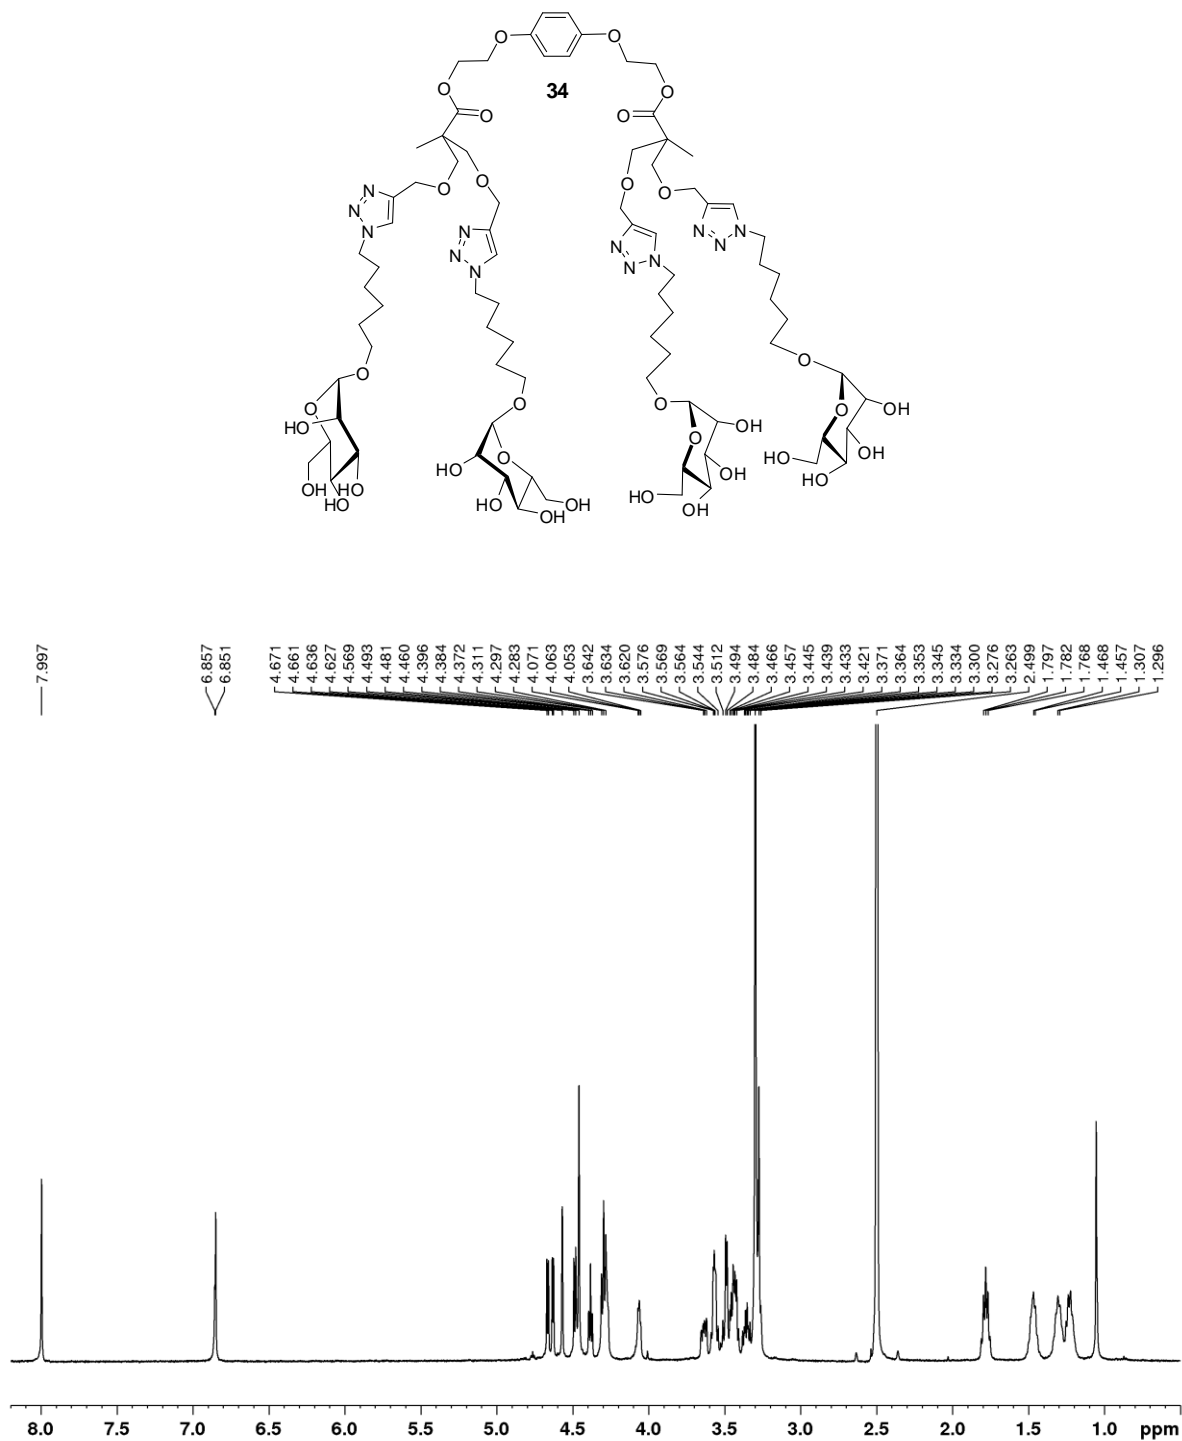

Expansion of part of the 500.13 MHz  $^1\text{H}$  NMR spectrum of tetramannoside polyester dendrimer (34) in dimethyl sulfoxide- $d_6$

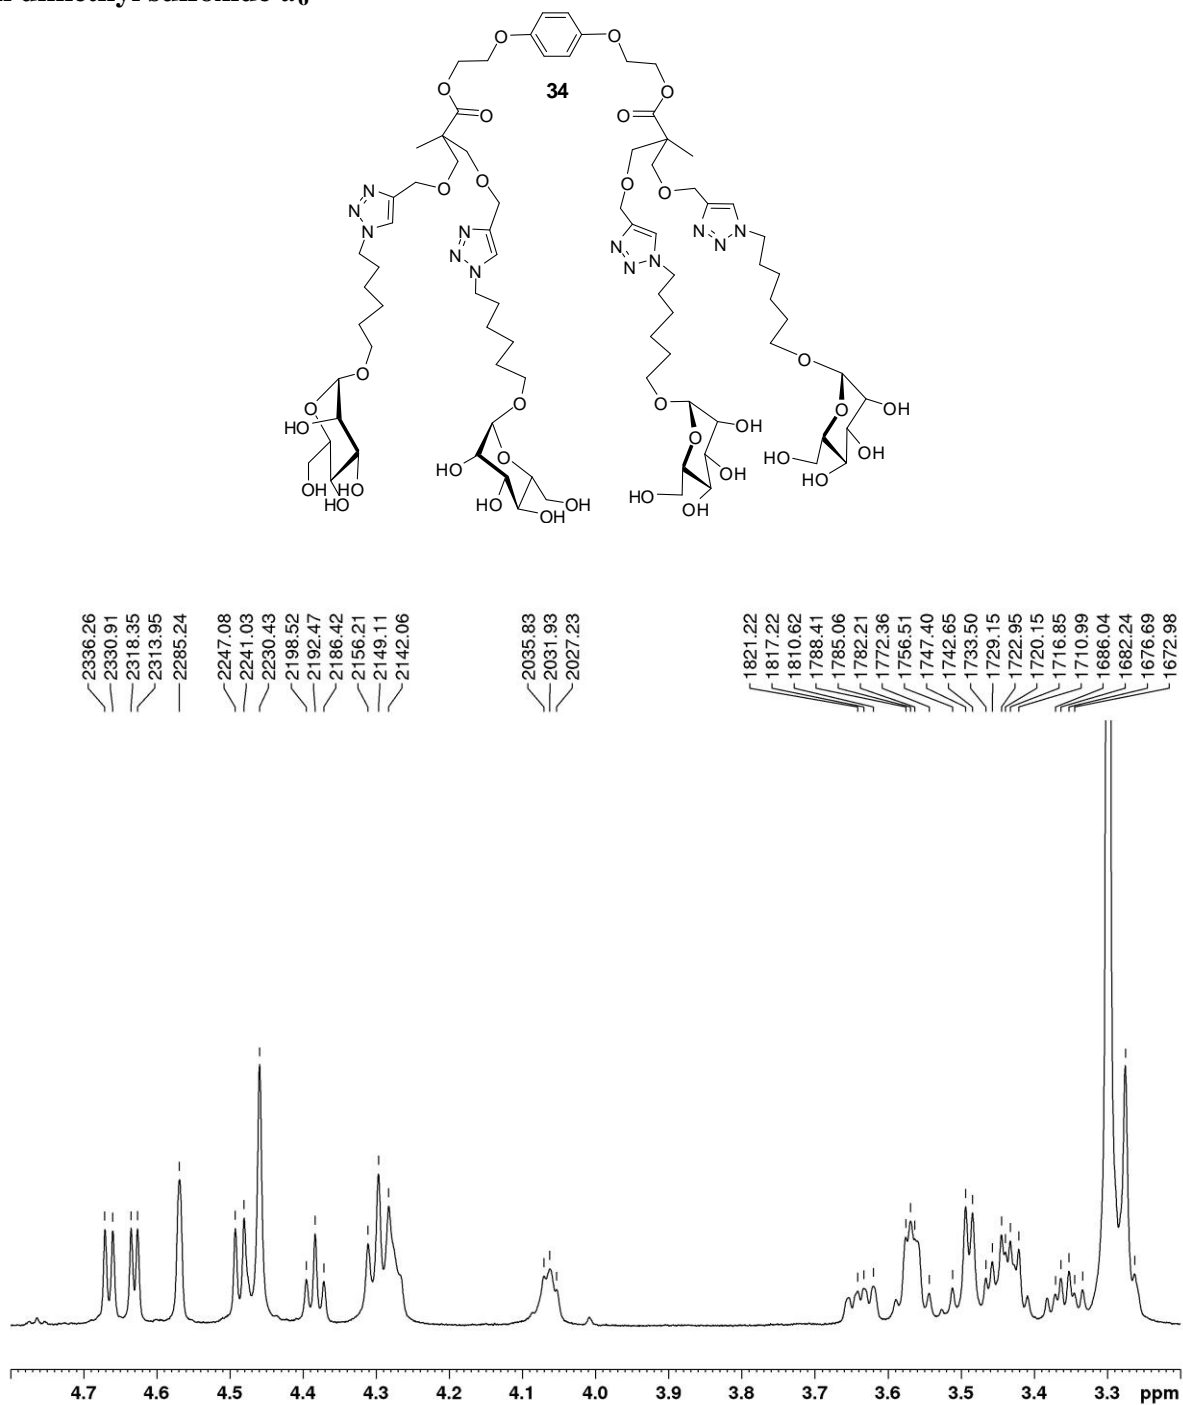

125.7 MHz  $^{13}\text{C}$  DeptQ spectrum of tetramannoside polyester dendrimer (34) in dimethyl sulfoxide- $d_6$

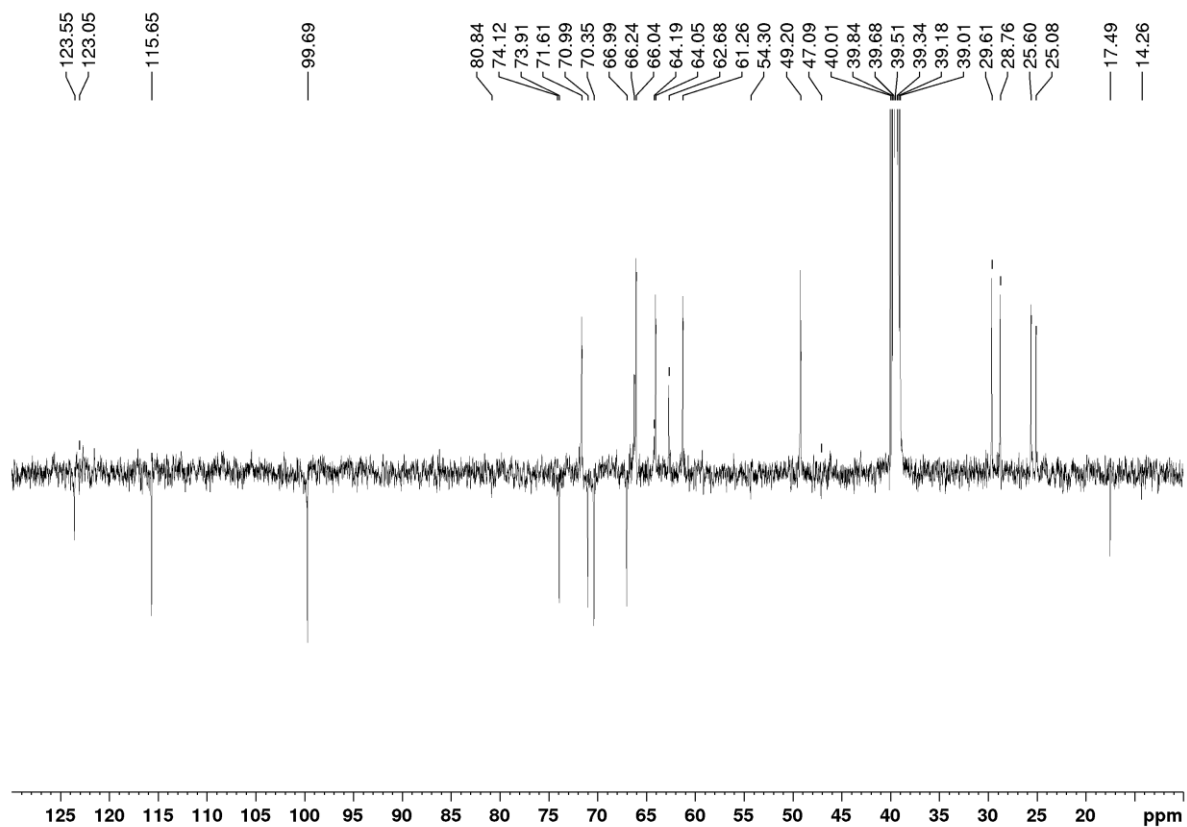

500.13 MHz  $^1\text{H}$  NMR spectrum of 2-(p-toluenesulfonyl)ethyl 2,2'-bis(2,2'-bis(2-propynyloxymethyl)propanoyloxymethyl)propanoate (**36**) in chloroform-*d*

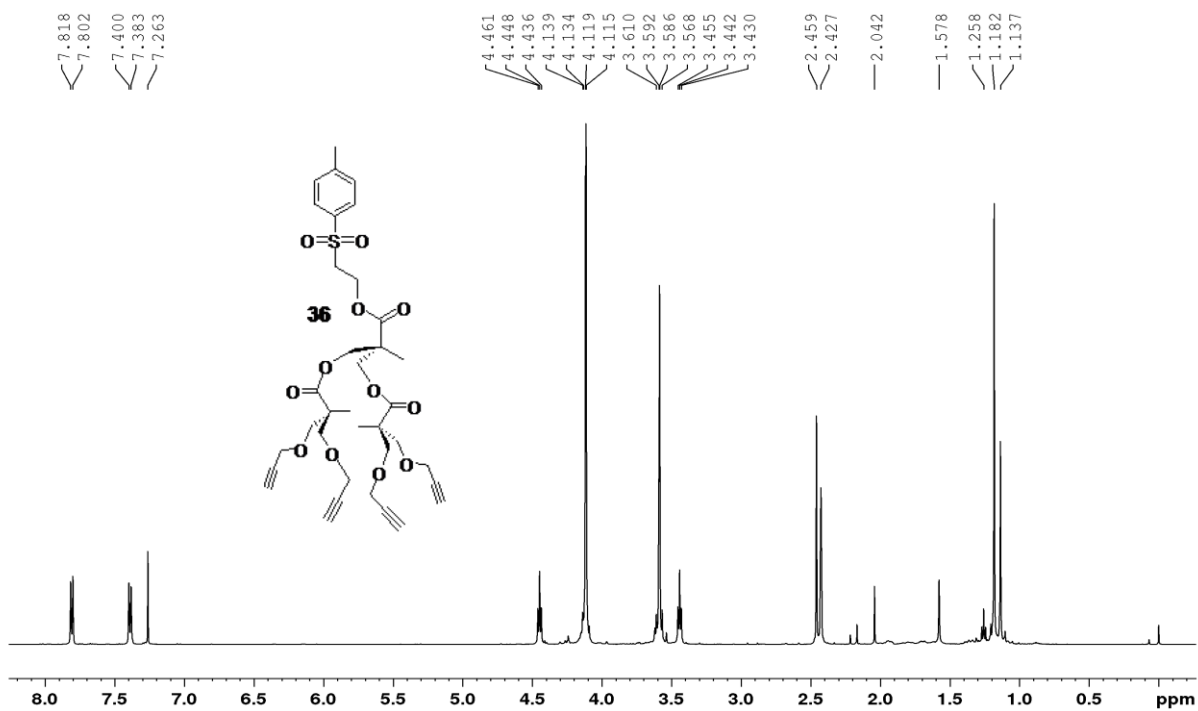

Expansion of part of the 500.13 MHz  $^1\text{H}$  NMR spectrum of 2-(p-toluenesulfonyl)ethyl 2,2'-bis(2,2'-bis-(2-propynyloxymethyl)propanoyloxymethyl)propanoate (**36**) in chloroform-

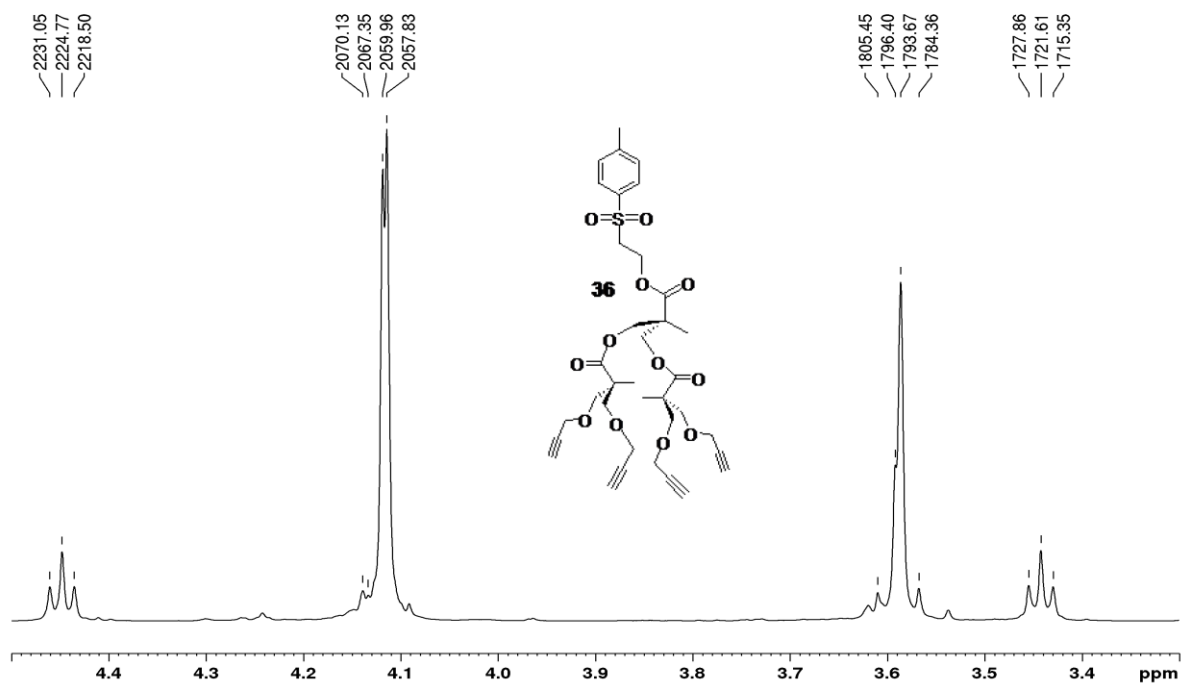



125.7 MHz  $^{13}\text{C}$  NMR spectrum of 2-(p-toluenesulfonyl)ethyl 2,2'-bis(2,2'-bis(2-propynyloxymethyl)propanoyloxymethyl)propanoate (**36**) in chloroform-*d*

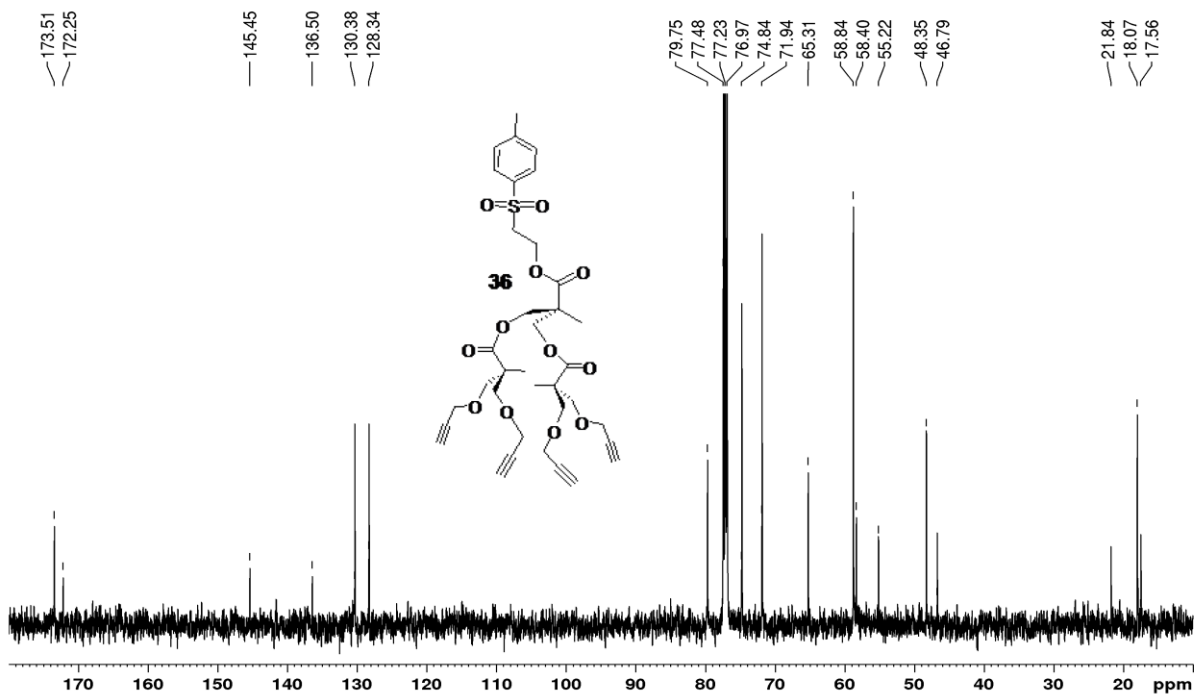

500.13 MHz  $^1\text{H}$  NMR spectrum of 2,2'-bis(2,2'-bis-(2-propynyloxymethyl)propanoyloxymethyl)propanoic acid (37) in chloroform-*d*

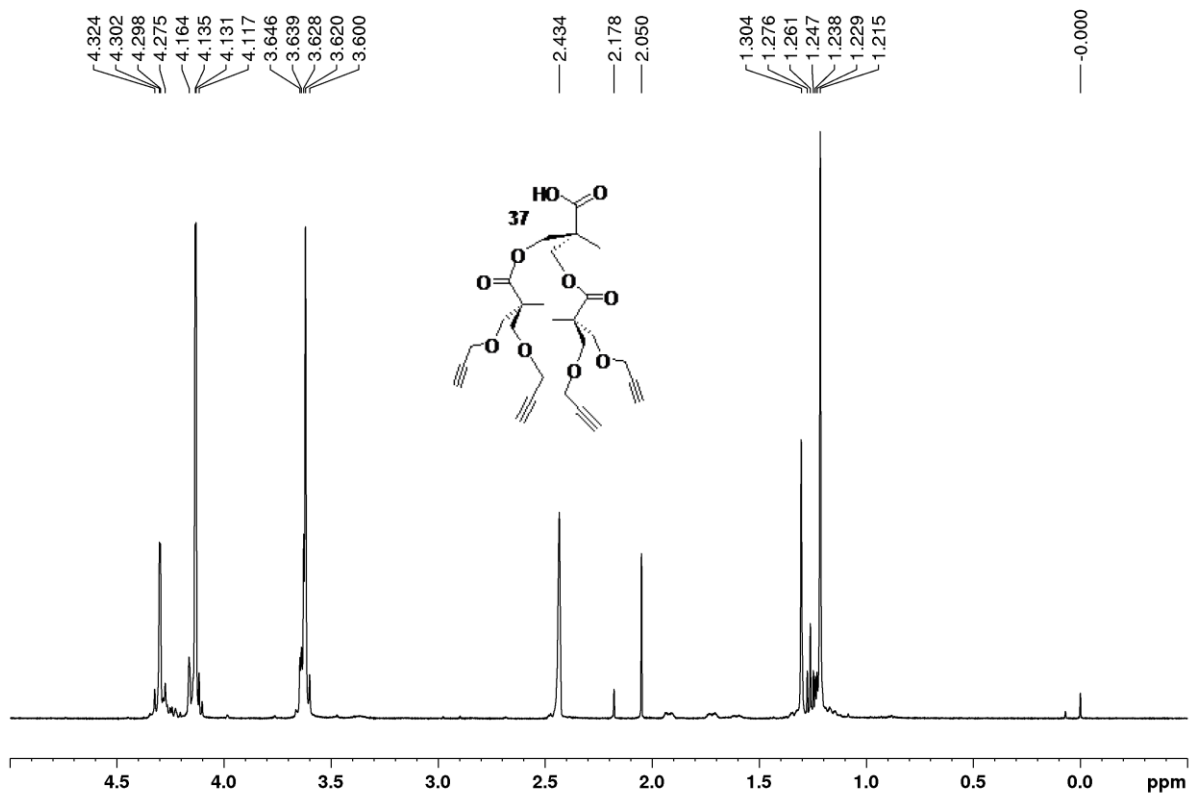

Expansion of part of the 500.13 MHz  $^1\text{H}$  NMR spectrum of 2,2'-bis(2,2'-bis-(2-propynyloxy-methyl)propanoyloxymethyl)propanoic acid (**37**) in chloroform-*d*

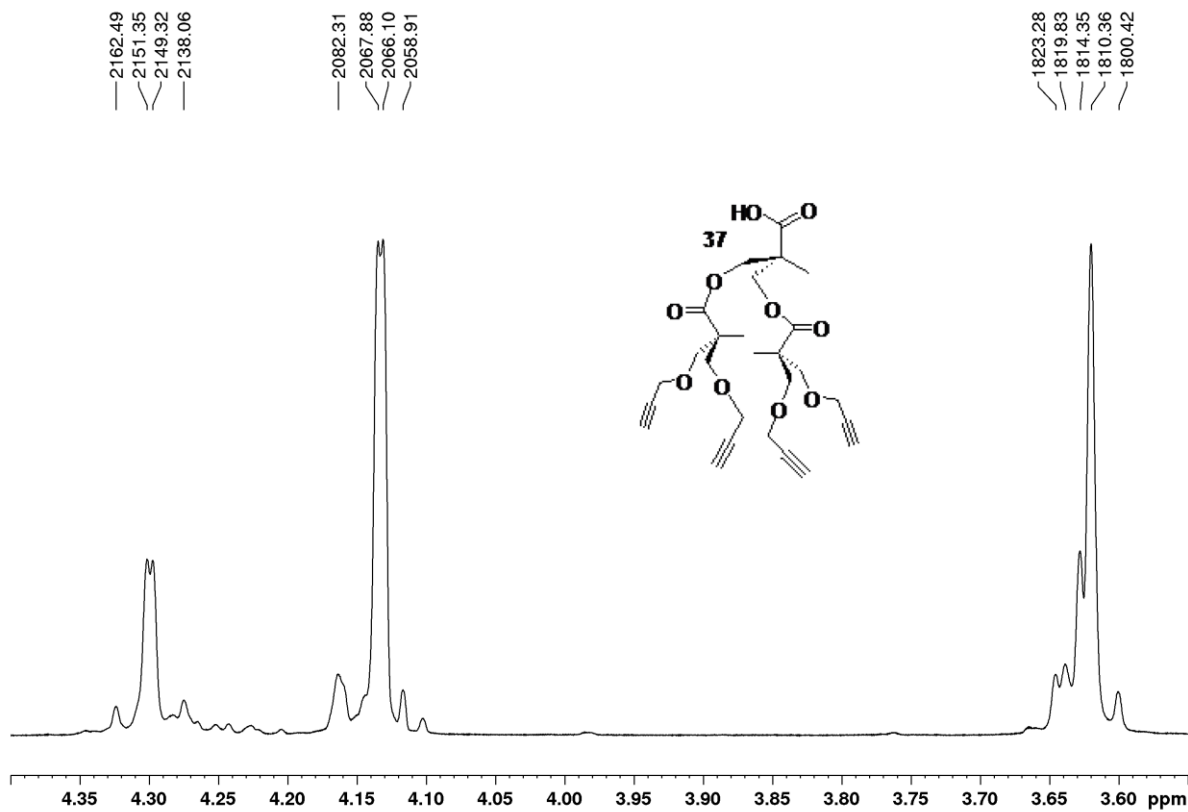

125.7 MHz <sup>13</sup>C NMR spectrum of 2,2'-bis(2,2'-bis(2-propynyloxymethyl)propanoyloxymethyl)-propanoic acid (37) in chloroform-*d*

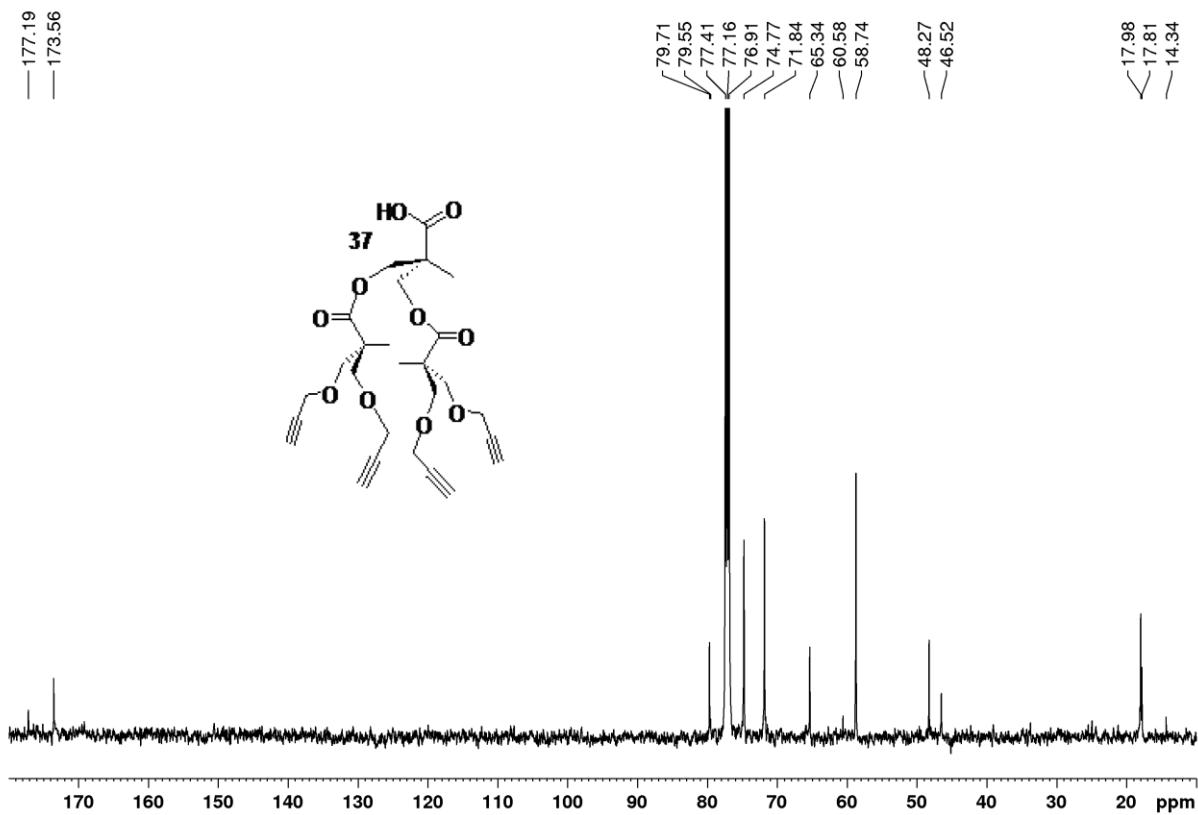

500.13 MHz  $^1\text{H}$  NMR spectrum of 2,2'-bis(2,2'-bis-(2-propynyloxymethyl)propanoyloxymethyl)-propanoic anhydride (**38**) in chloroform-*d*

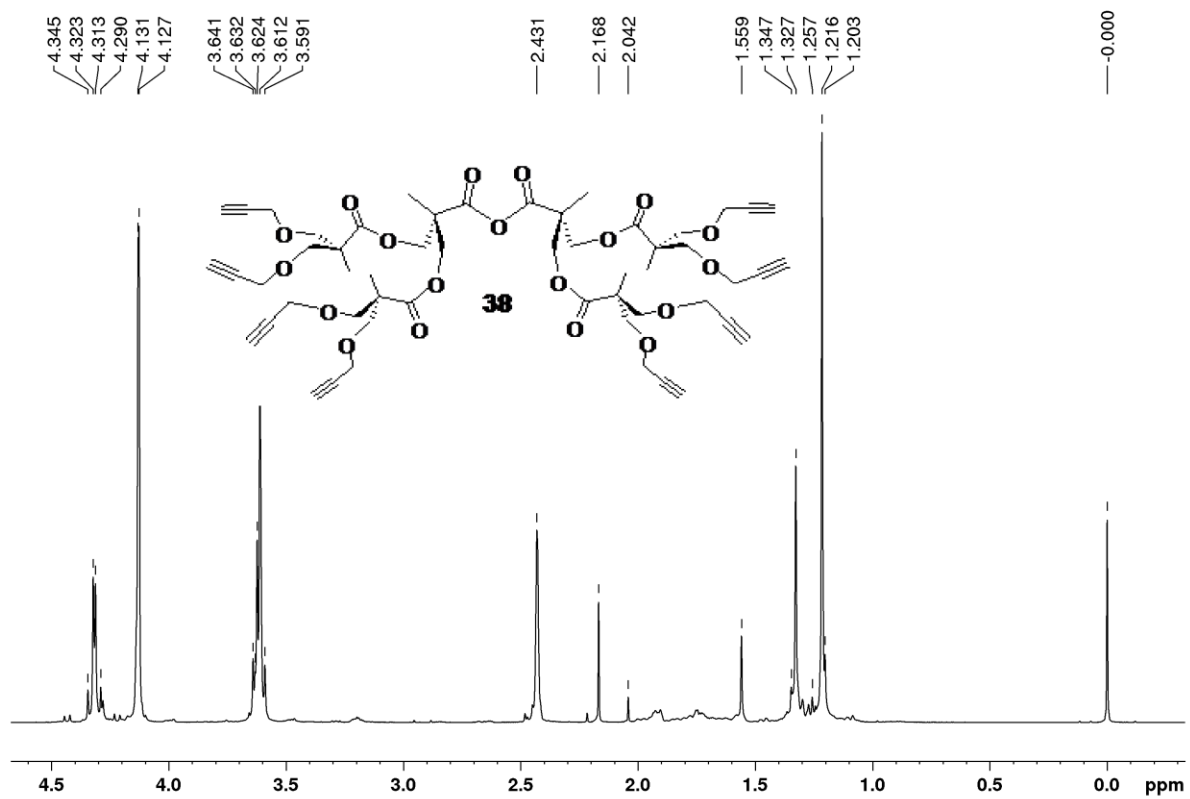

Expansion of part of the 500.13 MHz  $^1\text{H}$  NMR spectrum of 2,2'-bis(2,2'-bis(2-propynyloxy-methyl)propanoyloxymethyl)propanoic anhydride (**38**) in chloroform-*d*

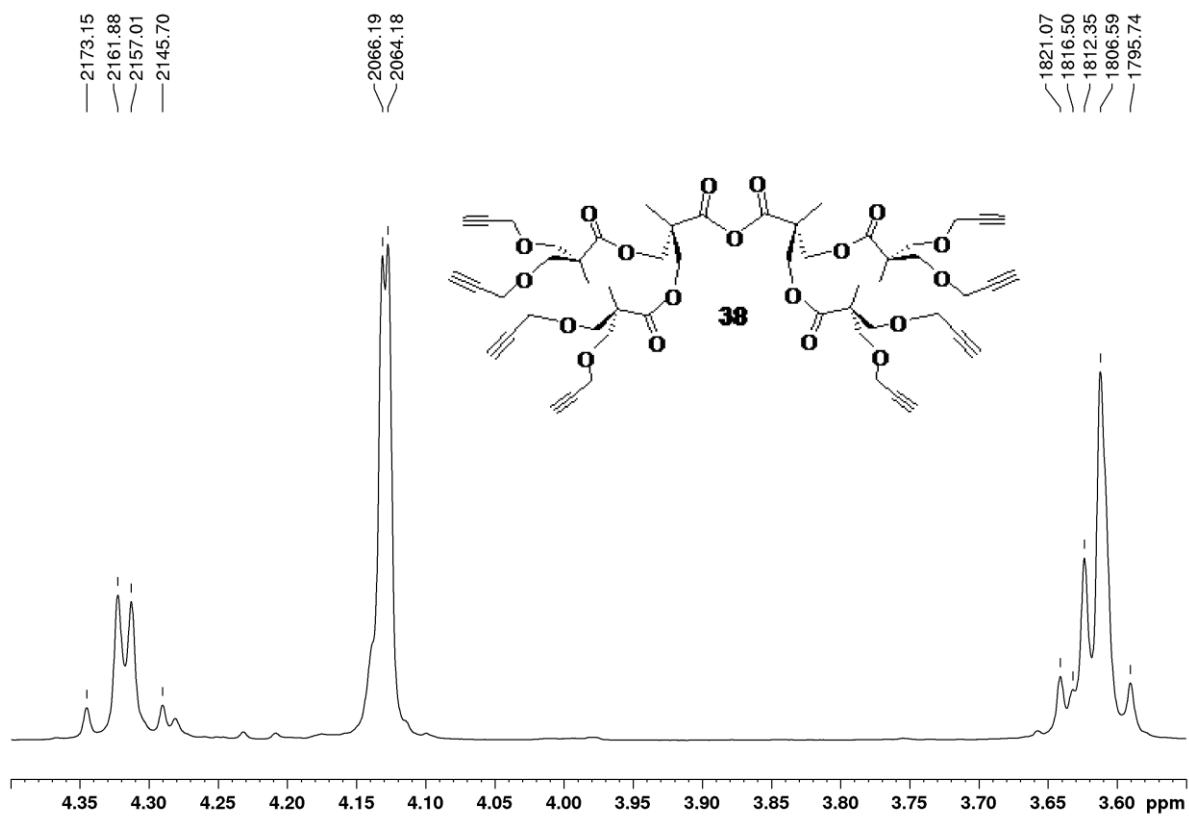

125.7 MHz  $^{13}\text{C}$  NMR spectrum of 2,2'-bis(2,2'-bis-(2-propynyloxymethyl)propanoyloxymethyl)-propanoic anhydride (**38**) in chloroform-*d*

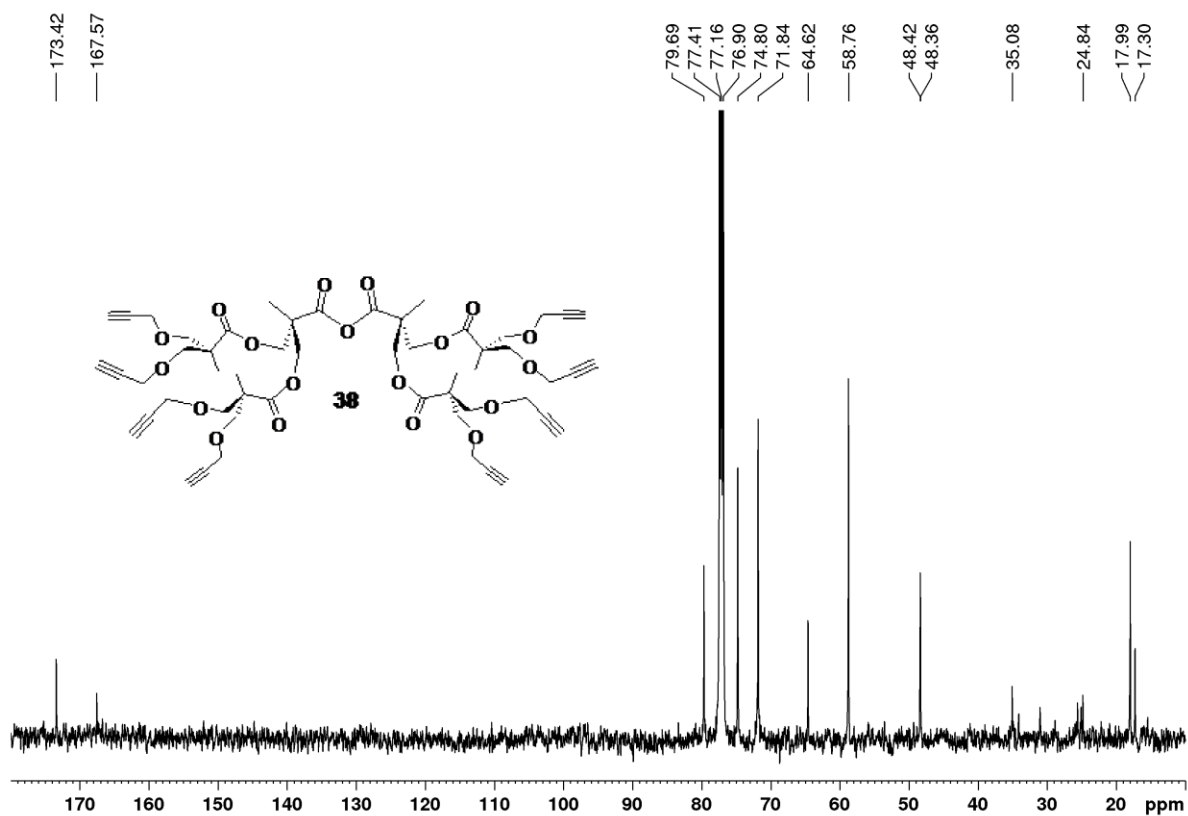

**500.13 MHz  $^1\text{H}$  NMR spectrum of octapropargylated polyester dendrimer (39) in chloroform-*d***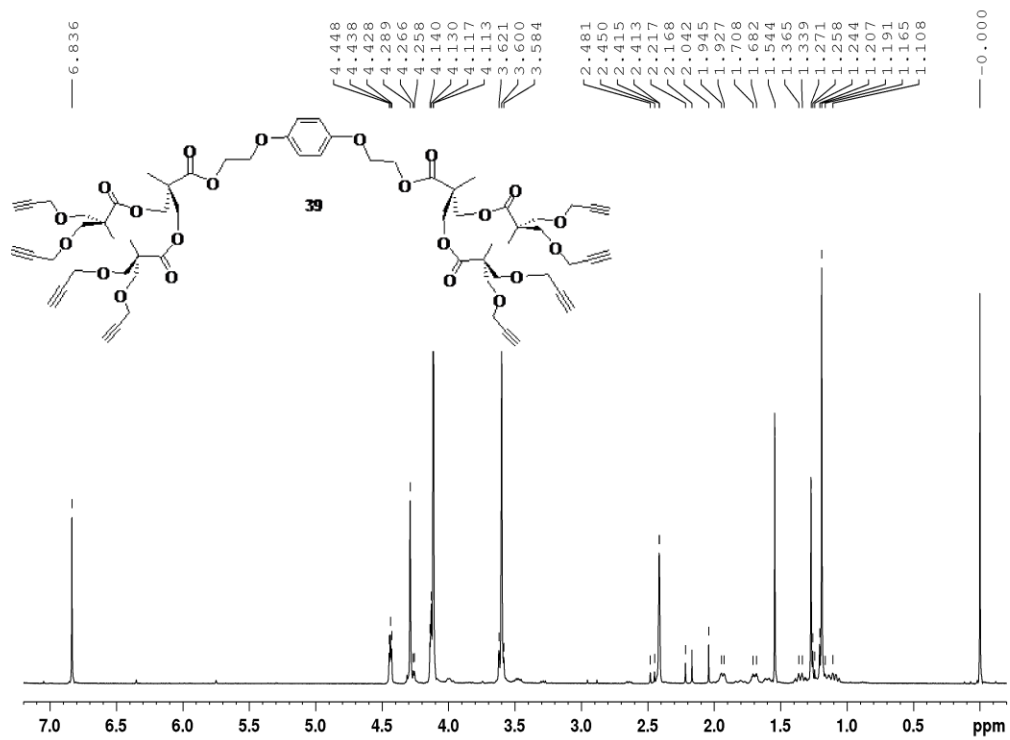



Expansion of part of the 500.13 MHz  $^1\text{H}$  NMR spectrum of octapropargylated polyester dendrimer (39) in chloroform-*d*

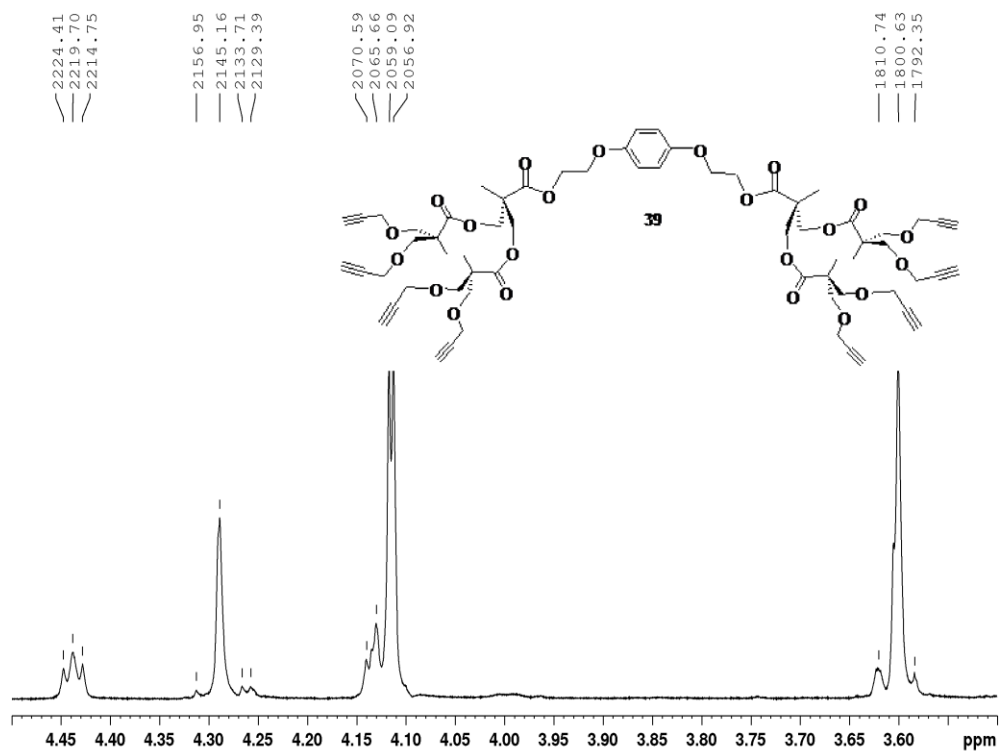

**125.7 MHz  $^{13}\text{C}$  NMR spectrum of octapropargylated polyester dendrimer (39) in chloroform-*d***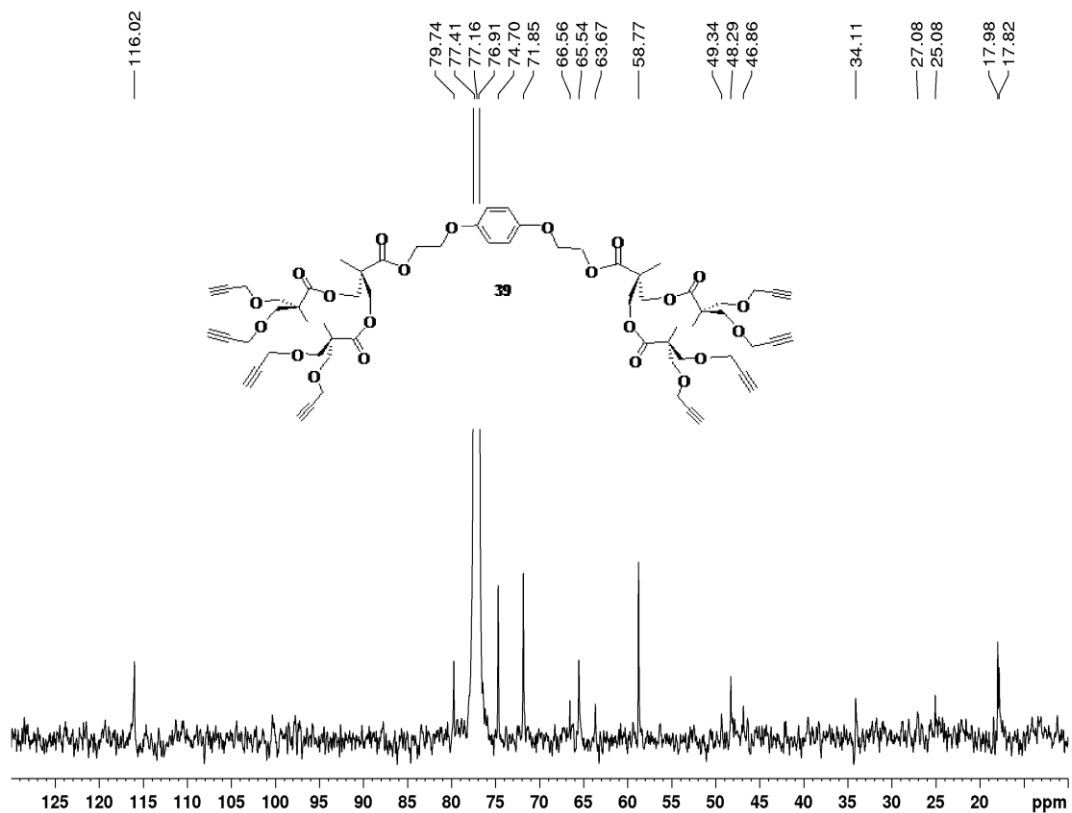

**500.13 MHz  $^1\text{H}$  NMR spectrum of octavalent mannose-terminated polyester dendrimer (40) in water- $d_2$** 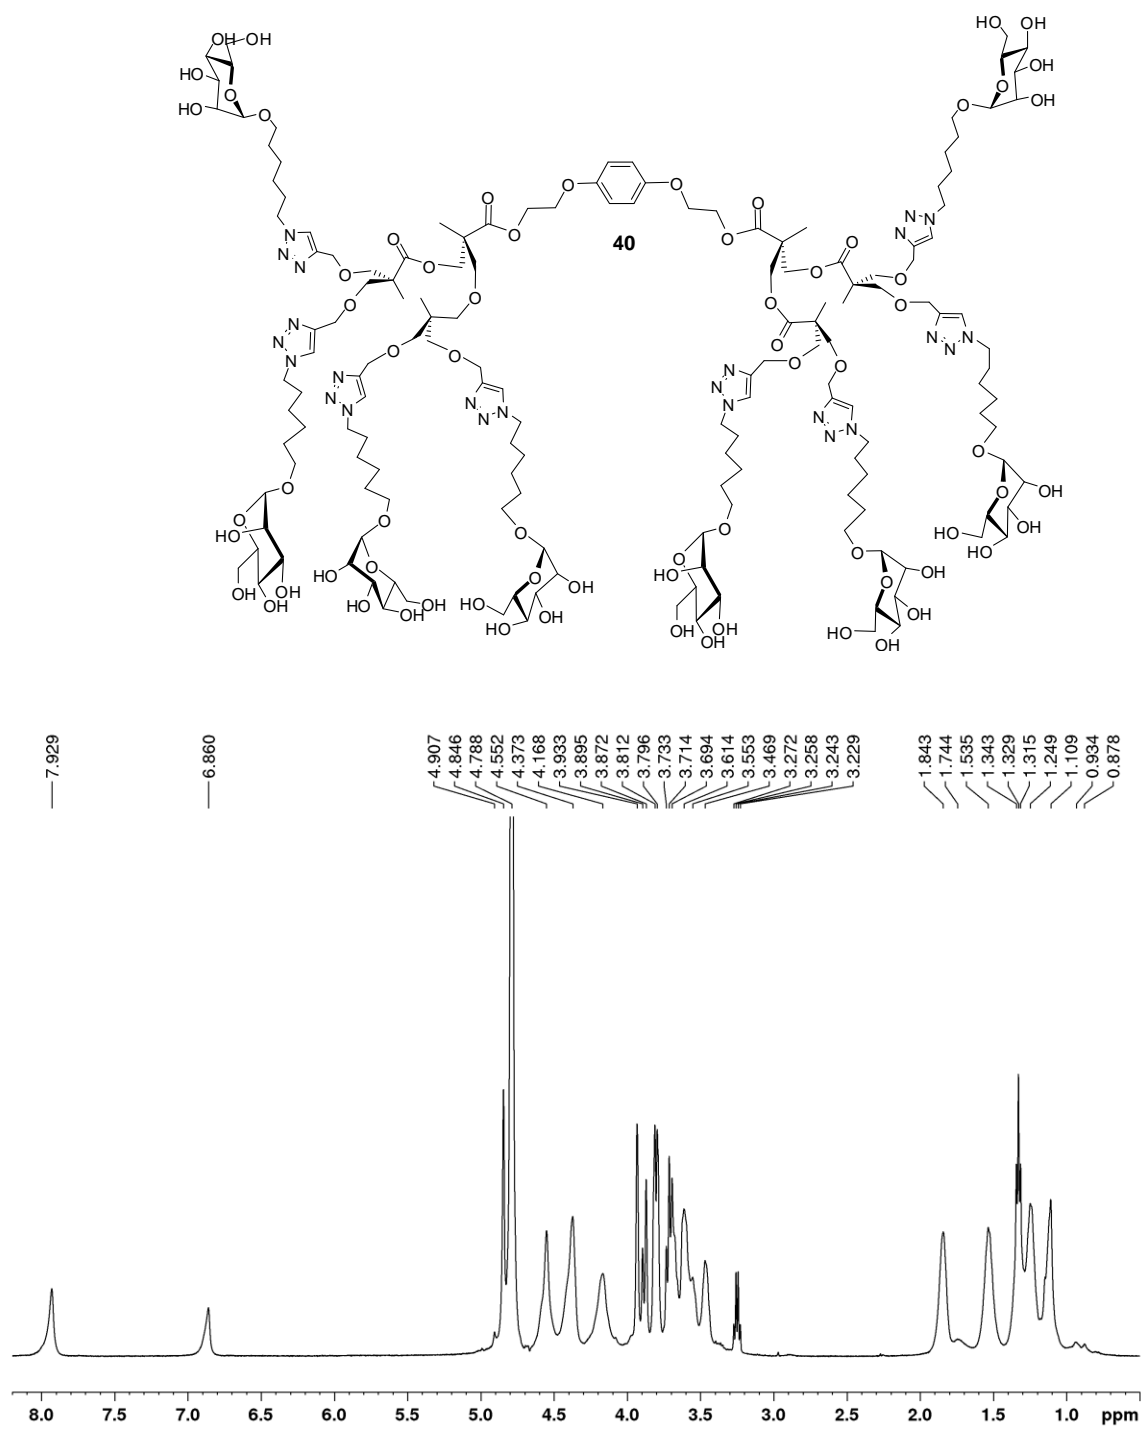

**125.7 MHz  $^{13}\text{C}$  NMR spectrum of octavalent mannose-terminated polyester dendrimer (40) in water- $d_2$**

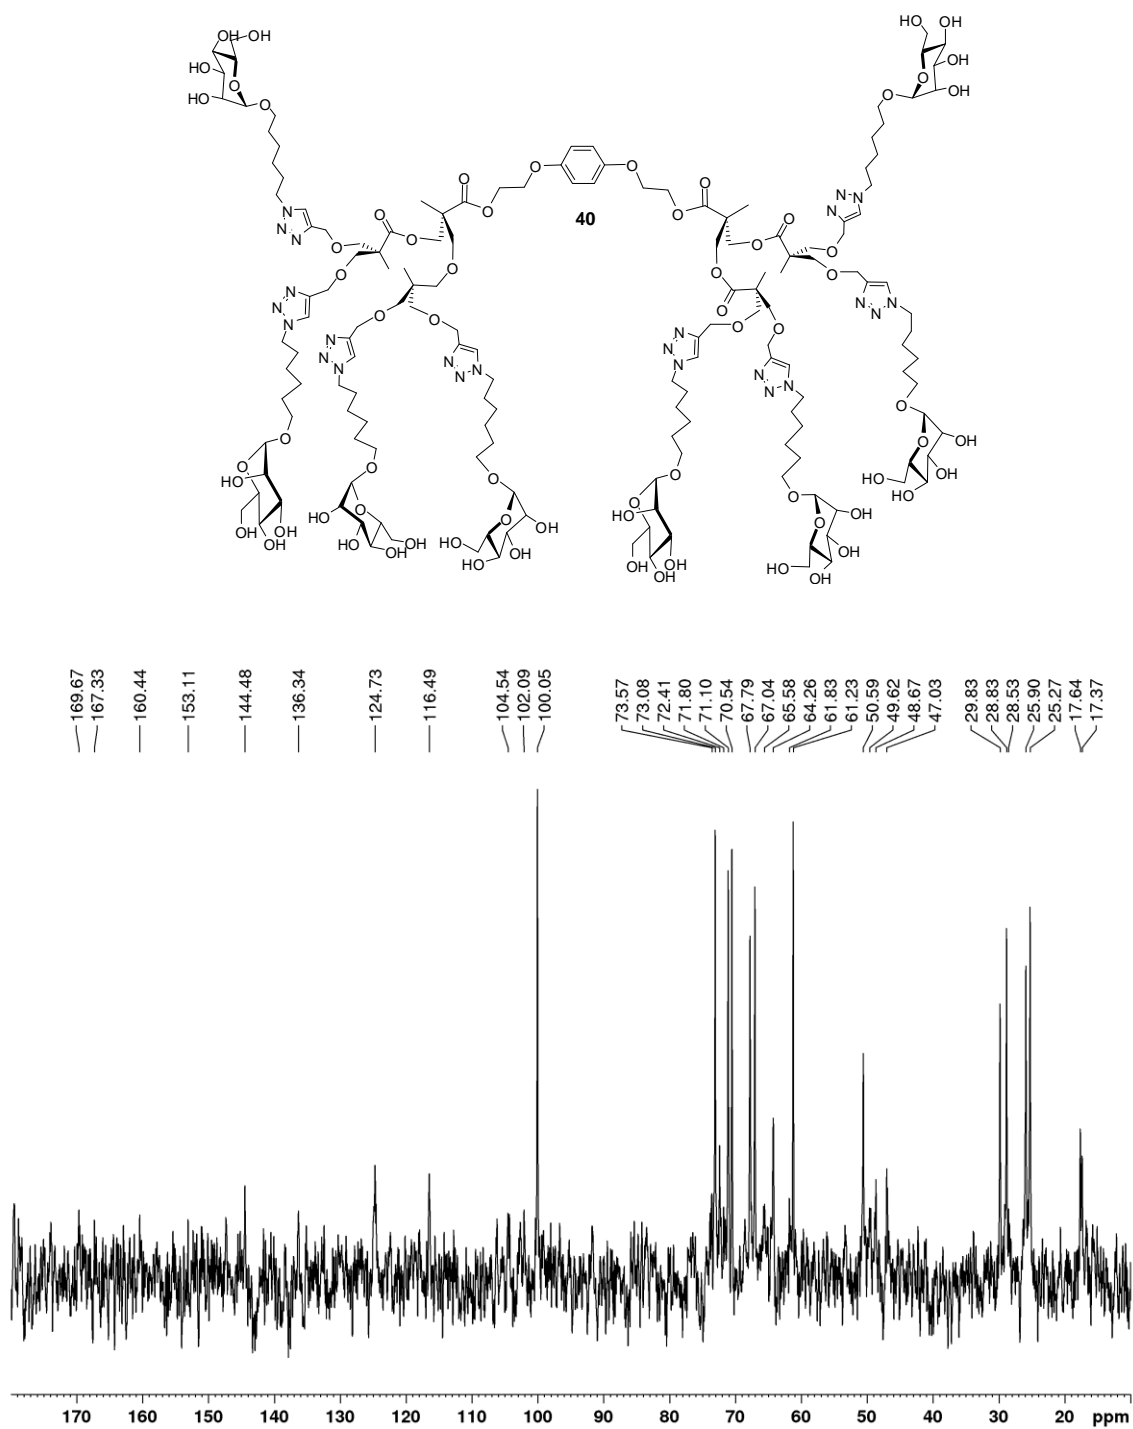

Expansion of part of the 125.7 MHz  $^{13}\text{C}$  NMR spectrum of octavalent mannose-terminated polyester dendrimer (40) in water- $d_2$

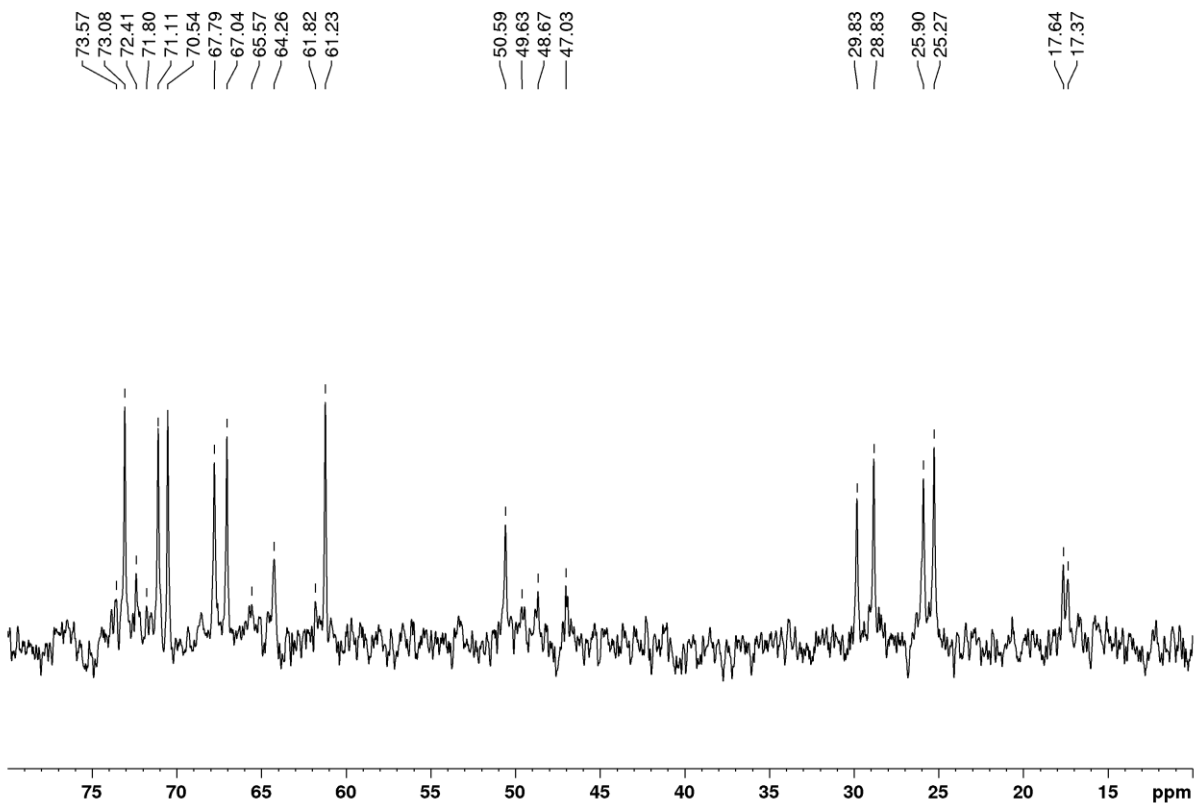

**125.7 MHz  $^{13}\text{C}$  DEPT Q NMR spectrum of octavalent mannose-terminated polyester dendrimer (40) in water- $d_2$**

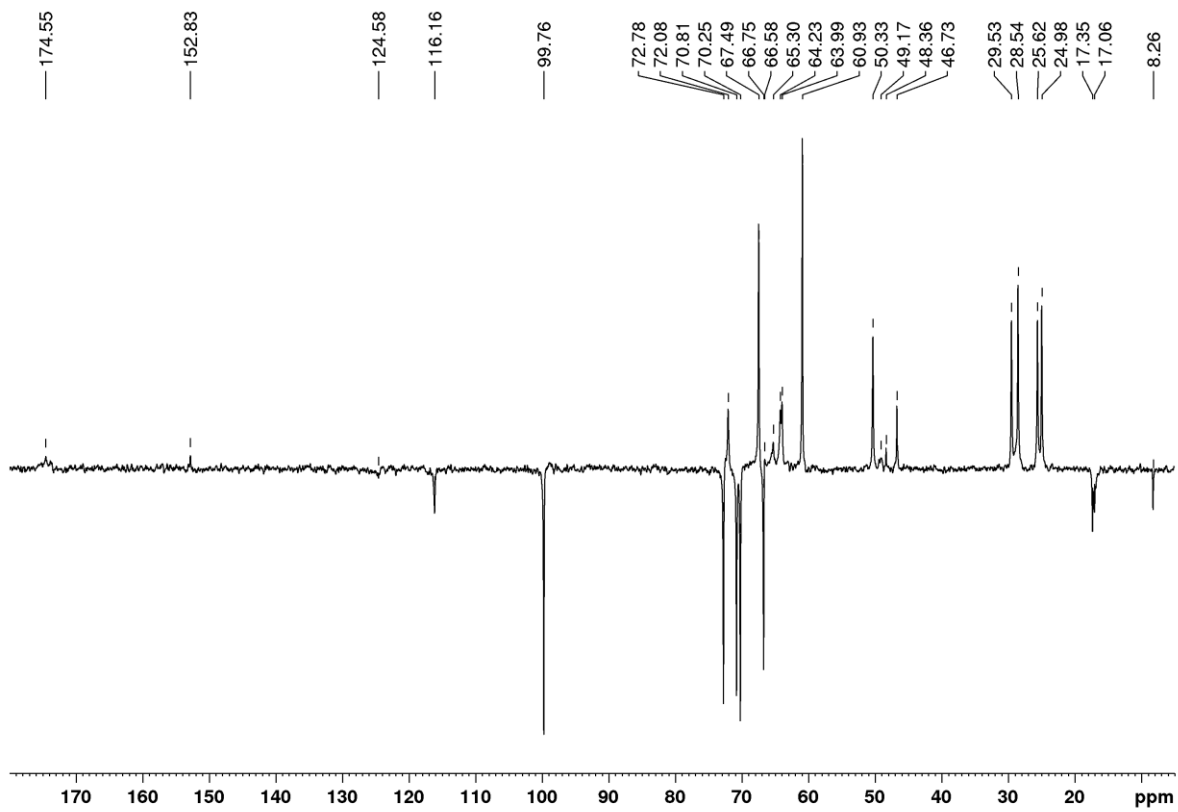

Supplement: c4nj00992d1.pdf [file c4nj00992d1.pdf]
